# Supplementary material
Source: PubMed Central journal article supplement (PMC6949128)
Supplement: EMS84576-supplement-2.pdf [file EMS84576-supplement-2.pdf]

section 7-4 left hemisphere

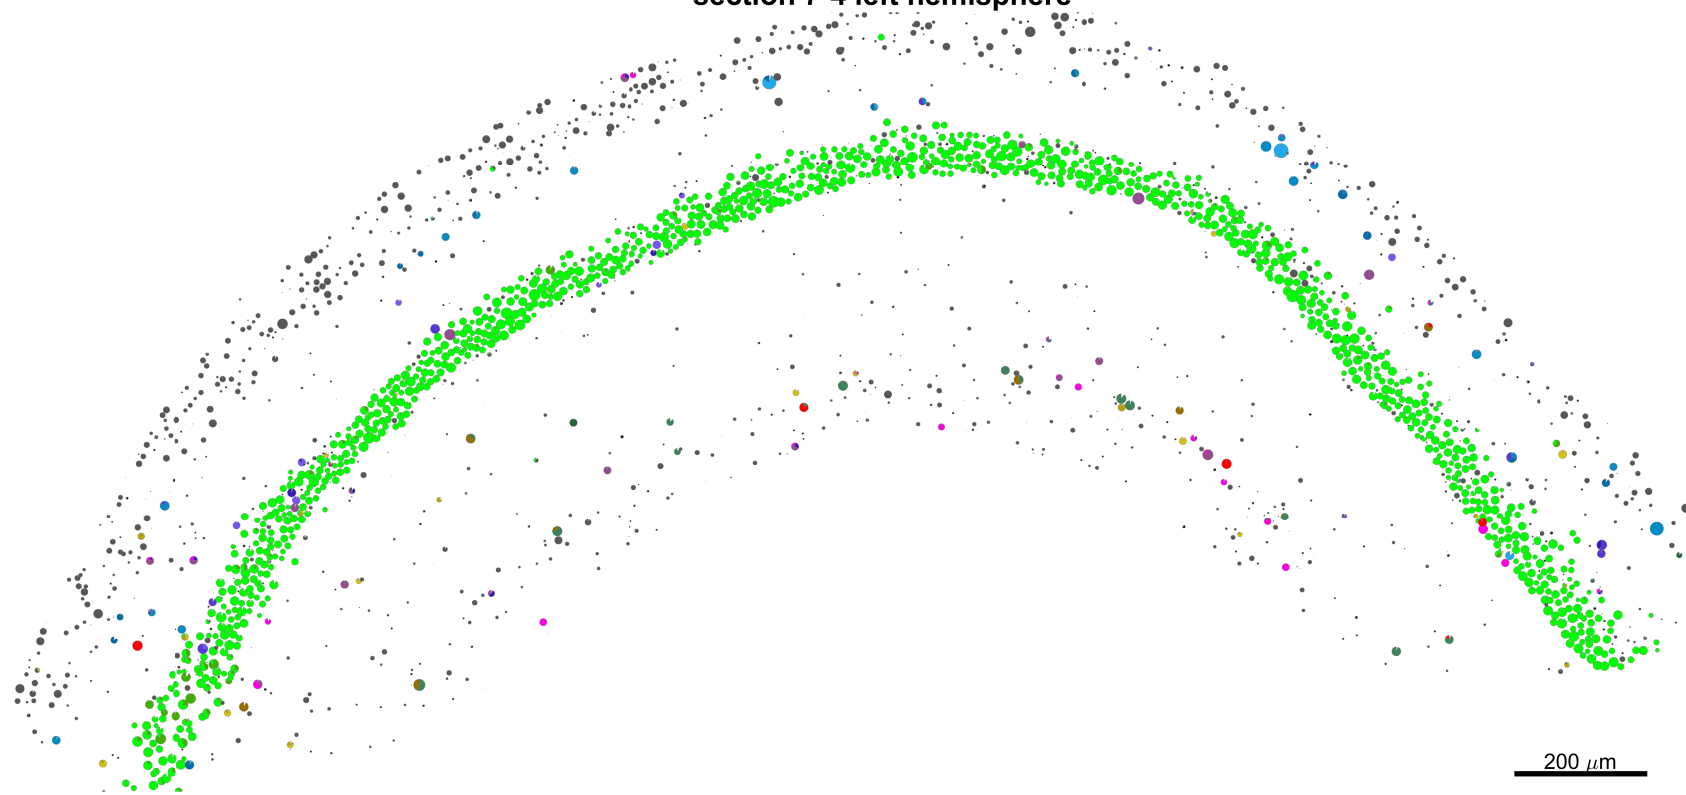

- O-Bi
- O/LM
- Hippocamposeptal
- Sst Nos1
- Axo-axonic
- Bistratified
- Basket
- MGE NGF/IVY
- CGE NGF
- Trilaminar
- Radiatum retrohip
- Cck Cxcl14+
- Cck Cxcl14-
- IS1
- IS3
- IS2
- PC CA1
- PC other
- Non neuron
- Uncalled

200  $\mu$ m

section 5-4 left hemisphere

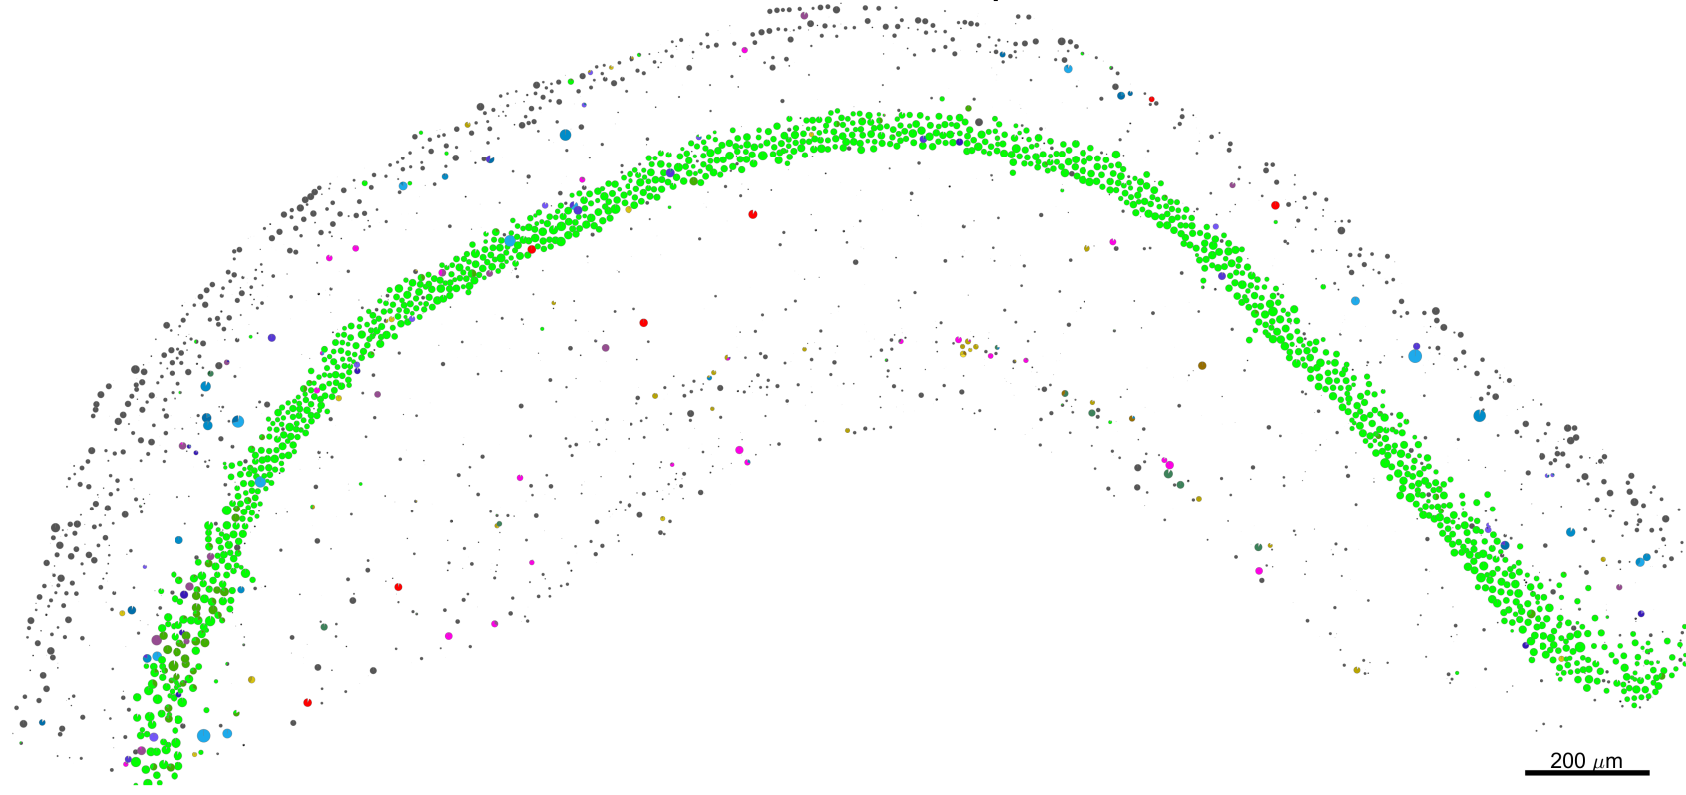

- O-Bi
- O/LM
- Hippocamptoseptal
- Sst Nos1
- Axo-axonic
- Bistratified
- Basket
- MGE NGF/IVY
- CGE NGF
- Trilaminar
- Radiatum retrohip
- Cck Cxcl14+
- Cck Cxcl14-
- IS1
- IS3
- IS2
- PC CA1
- PC other
- Non neuron
- Uncalled

200  $\mu$ m

section 3-4 left hemisphere

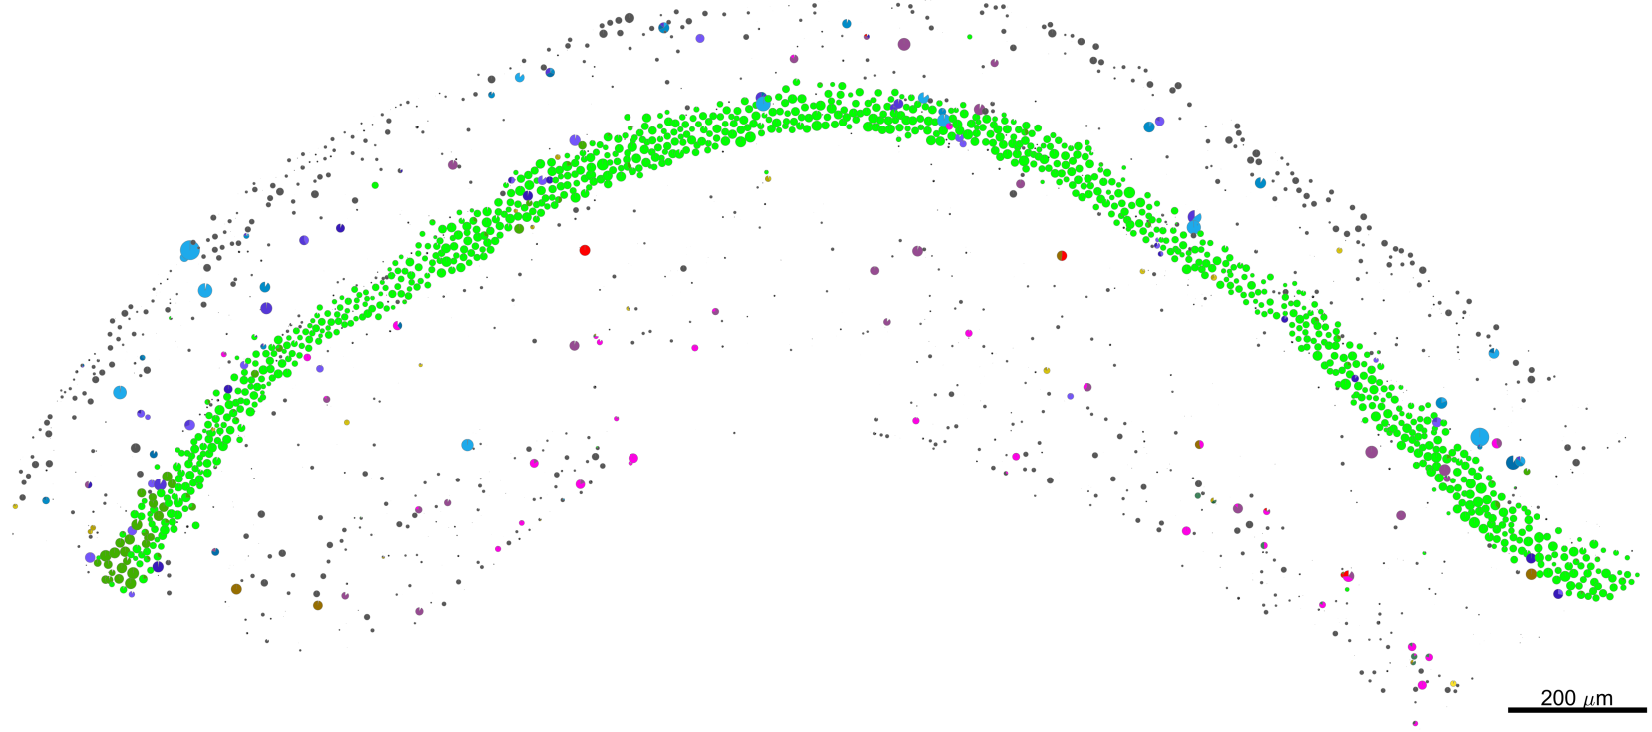

- O-Bi
- O/LM
- Hippocamptoseptal
- Sst Nos1
- Axo-axonic
- Bistratified
- Basket
- MGE NGF/IVY
- CGE NGF
- Trilaminar
- Radiatum retrohip
- Cck Cxcl14+
- Cck Cxcl14-
- IS1
- IS3
- IS2
- PC CA1
- PC other
- Non neuron
- Uncalled

200  $\mu$ m

section 7-3 left hemisphere

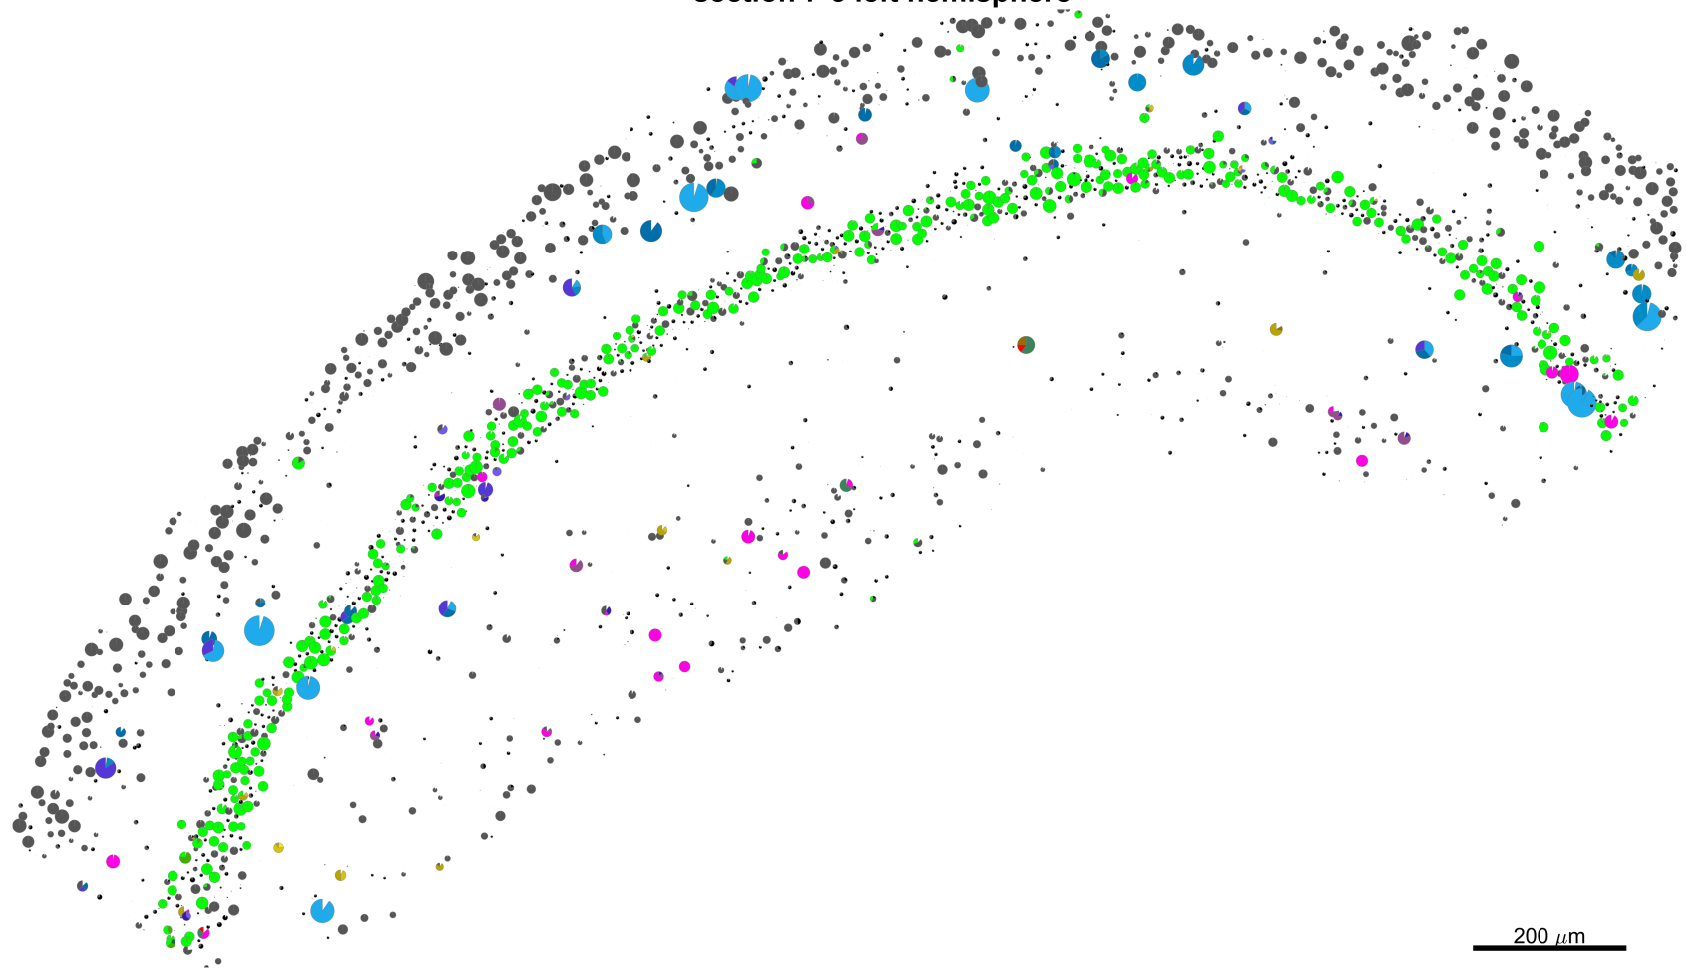

- O-Bi
- O/LM
- Hippocamposeptal
- Sst Nos1
- Axo-axonic
- Bistratified
- Basket
- MGE NGF/IVY
- CGE NGF
- Trilaminar
- Radiatum retrohip
- Cck Cxcl14+
- Cck Cxcl14-
- IS1
- IS3
- IS2
- PC CA1
- PC other
- Non neuron
- Uncalled

200  $\mu$ m

section 5-3 left hemisphere

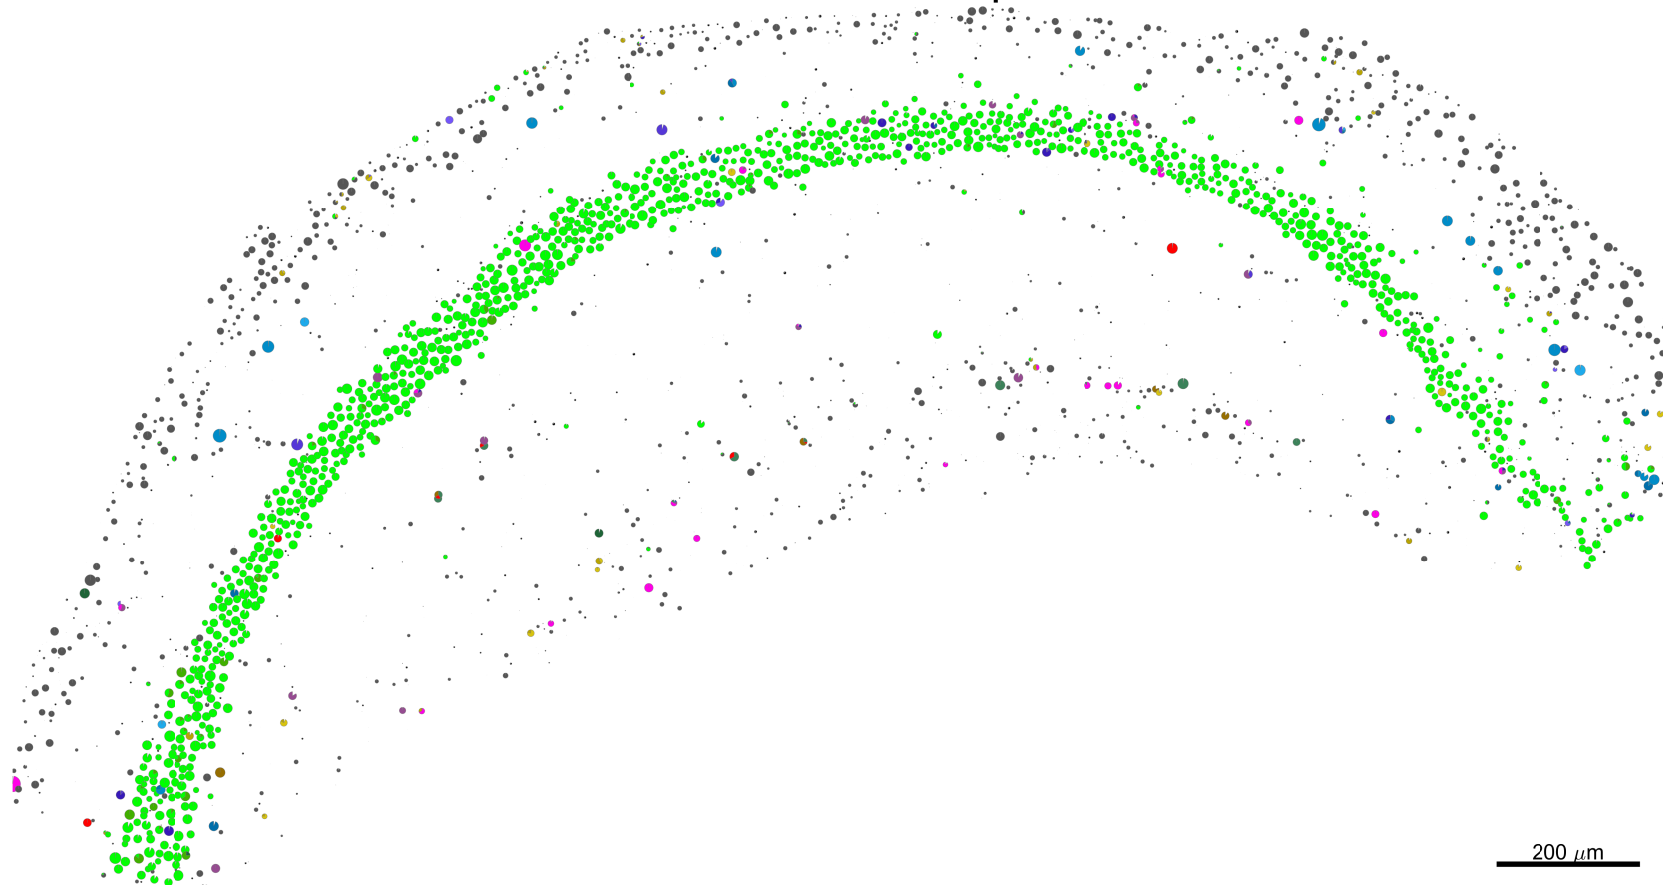

- O-Bi
- O/LM
- Hippocamposeptal
- Sst Nos1
- Axo-axonic
- Bistratified
- Basket
- MGE NGF/IVY
- CGE NGF
- Trilaminar
- Radiatum retrohip
- Cck Cxcl14+
- Cck Cxcl14-
- IS1
- IS3
- IS2
- PC CA1
- PC other
- Non neuron
- Uncalled

section 4-3 left hemisphere

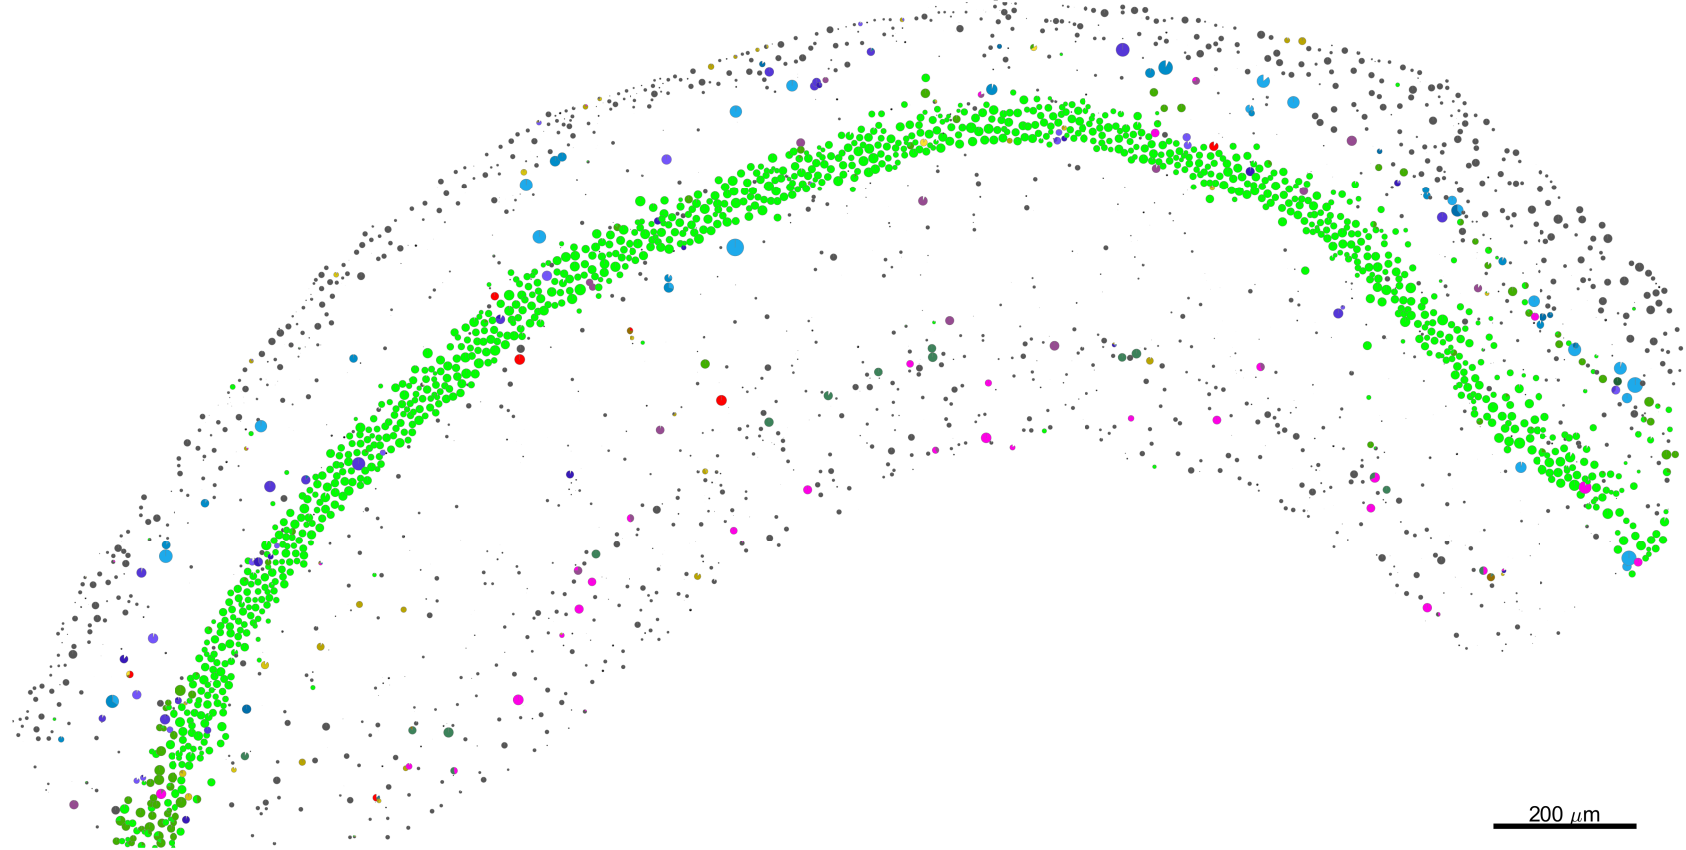

- O-Bi
- O/LM
- Hippocamptoseptal
- Sst Nos1
- Axo-axonic
- Bistratified
- Basket
- MGE NGF/IVY
- CGE NGF
- Trilaminar
- Radiatum retrohip
- Cck Cxcl14+
- Cck Cxcl14-
- IS1
- IS3
- IS2
- PC CA1
- PC other
- Non neuron
- Uncalled

200  $\mu$ m

section 3-3 left hemisphere

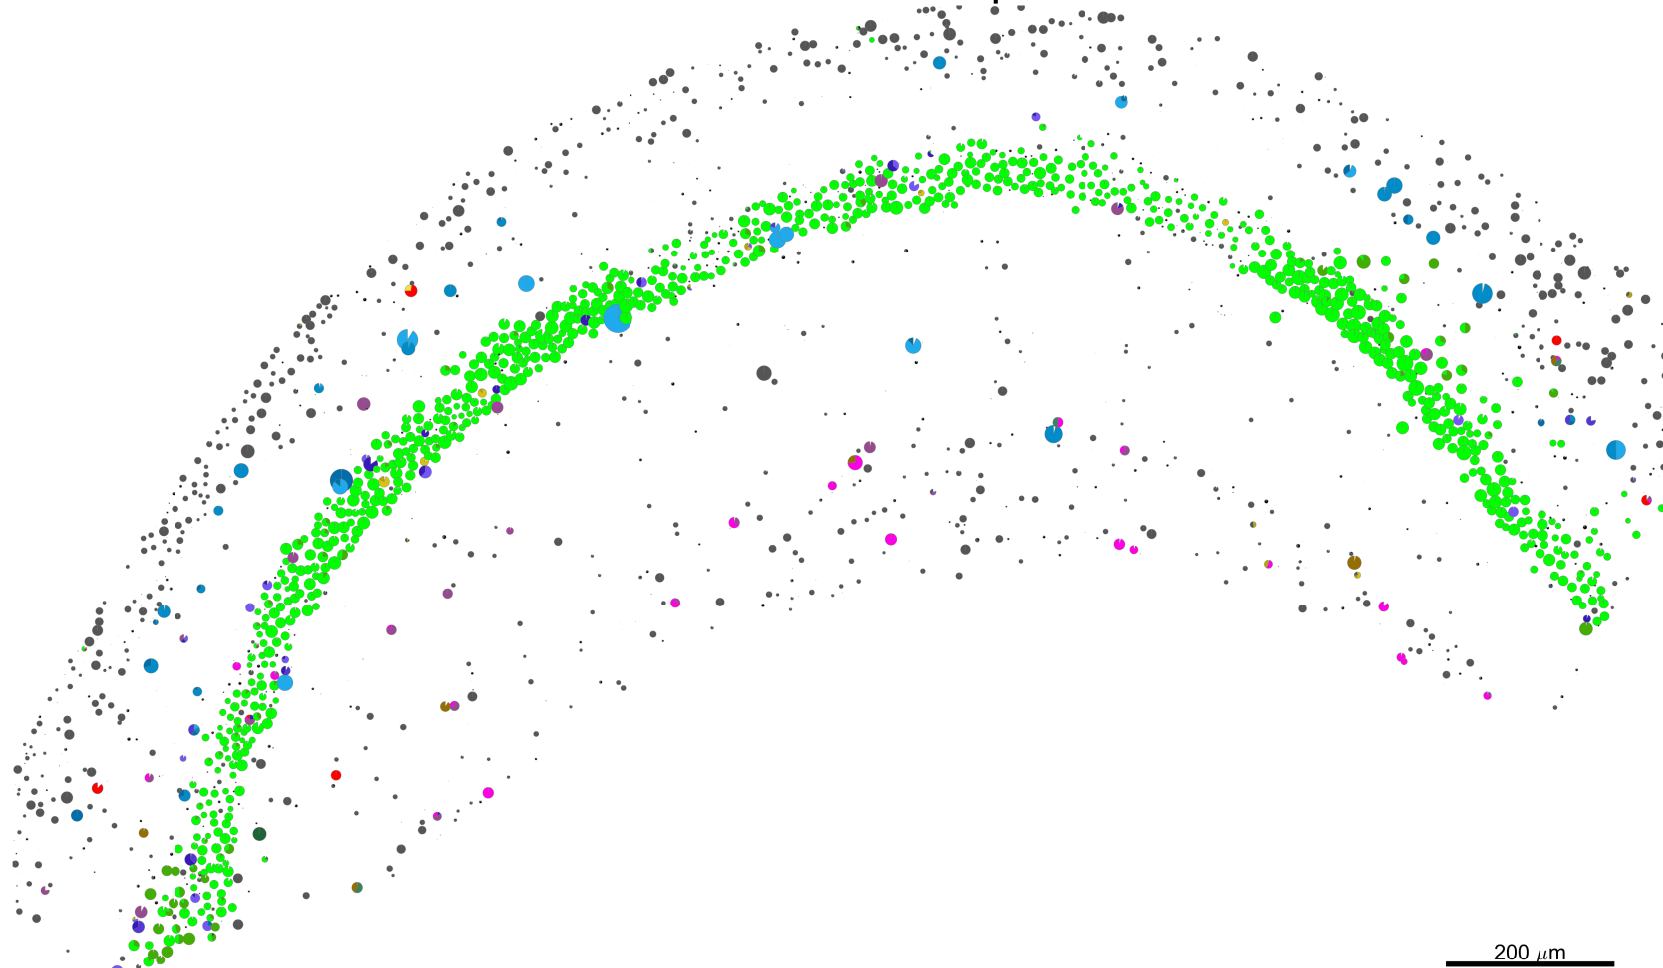

- O-Bi
- O/LM
- Hippocamposeptal
- Sst Nos1
- Axo-axonic
- Bistratified
- Basket
- MGE NGF/IVY
- CGE NGF
- Trilaminar
- Radiatum retrohip
- Cck Cxcl14+
- Cck Cxcl14-
- IS1
- IS3
- IS2
- PC CA1
- PC other
- Non neuron
- Uncalled

200  $\mu$ m

section 7-2 left hemisphere

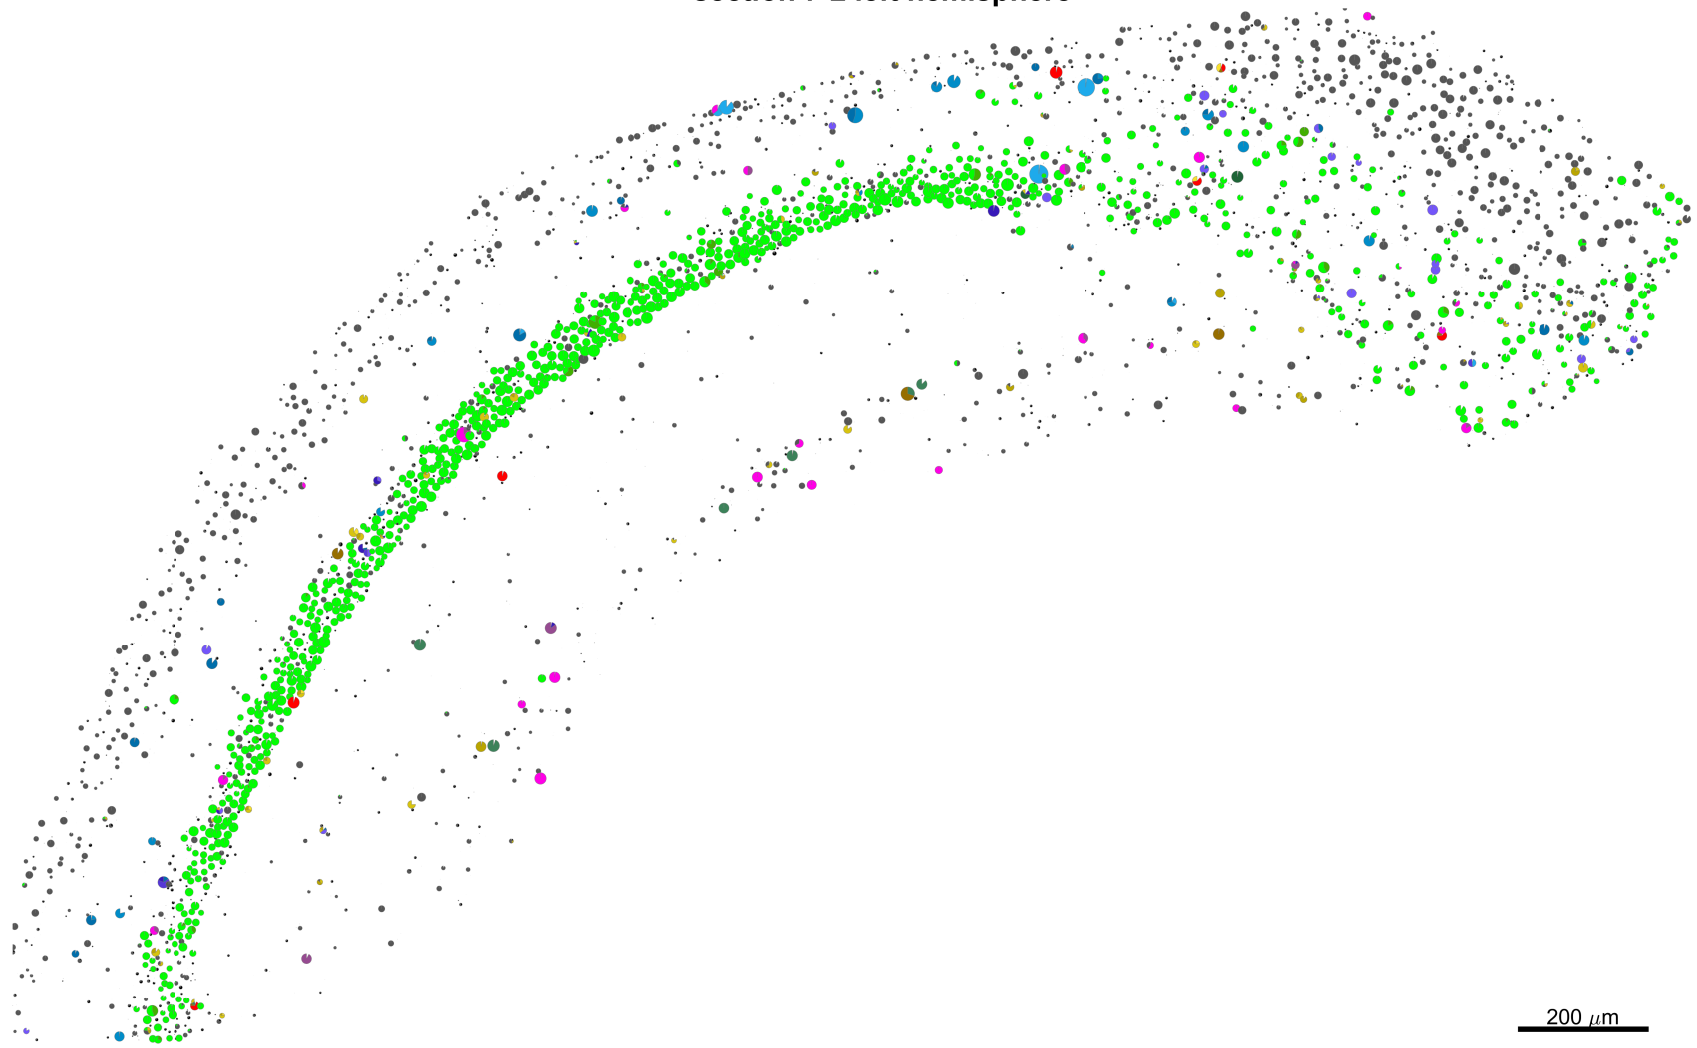

- O-Bi
- O/LM
- Hippocamptoseptal
- Sst Nos1
- Axo-axonic
- Bistratified
- Basket
- MGE NGF/IVY
- CGE NGF
- Trilaminar
- Radiatum retrohip
- Cck Cxcl14+
- Cck Cxcl14-
- IS1
- IS3
- IS2
- PC CA1
- PC other
- Non neuron
- Uncalled

200  $\mu$ m



section 5-2 left hemisphere

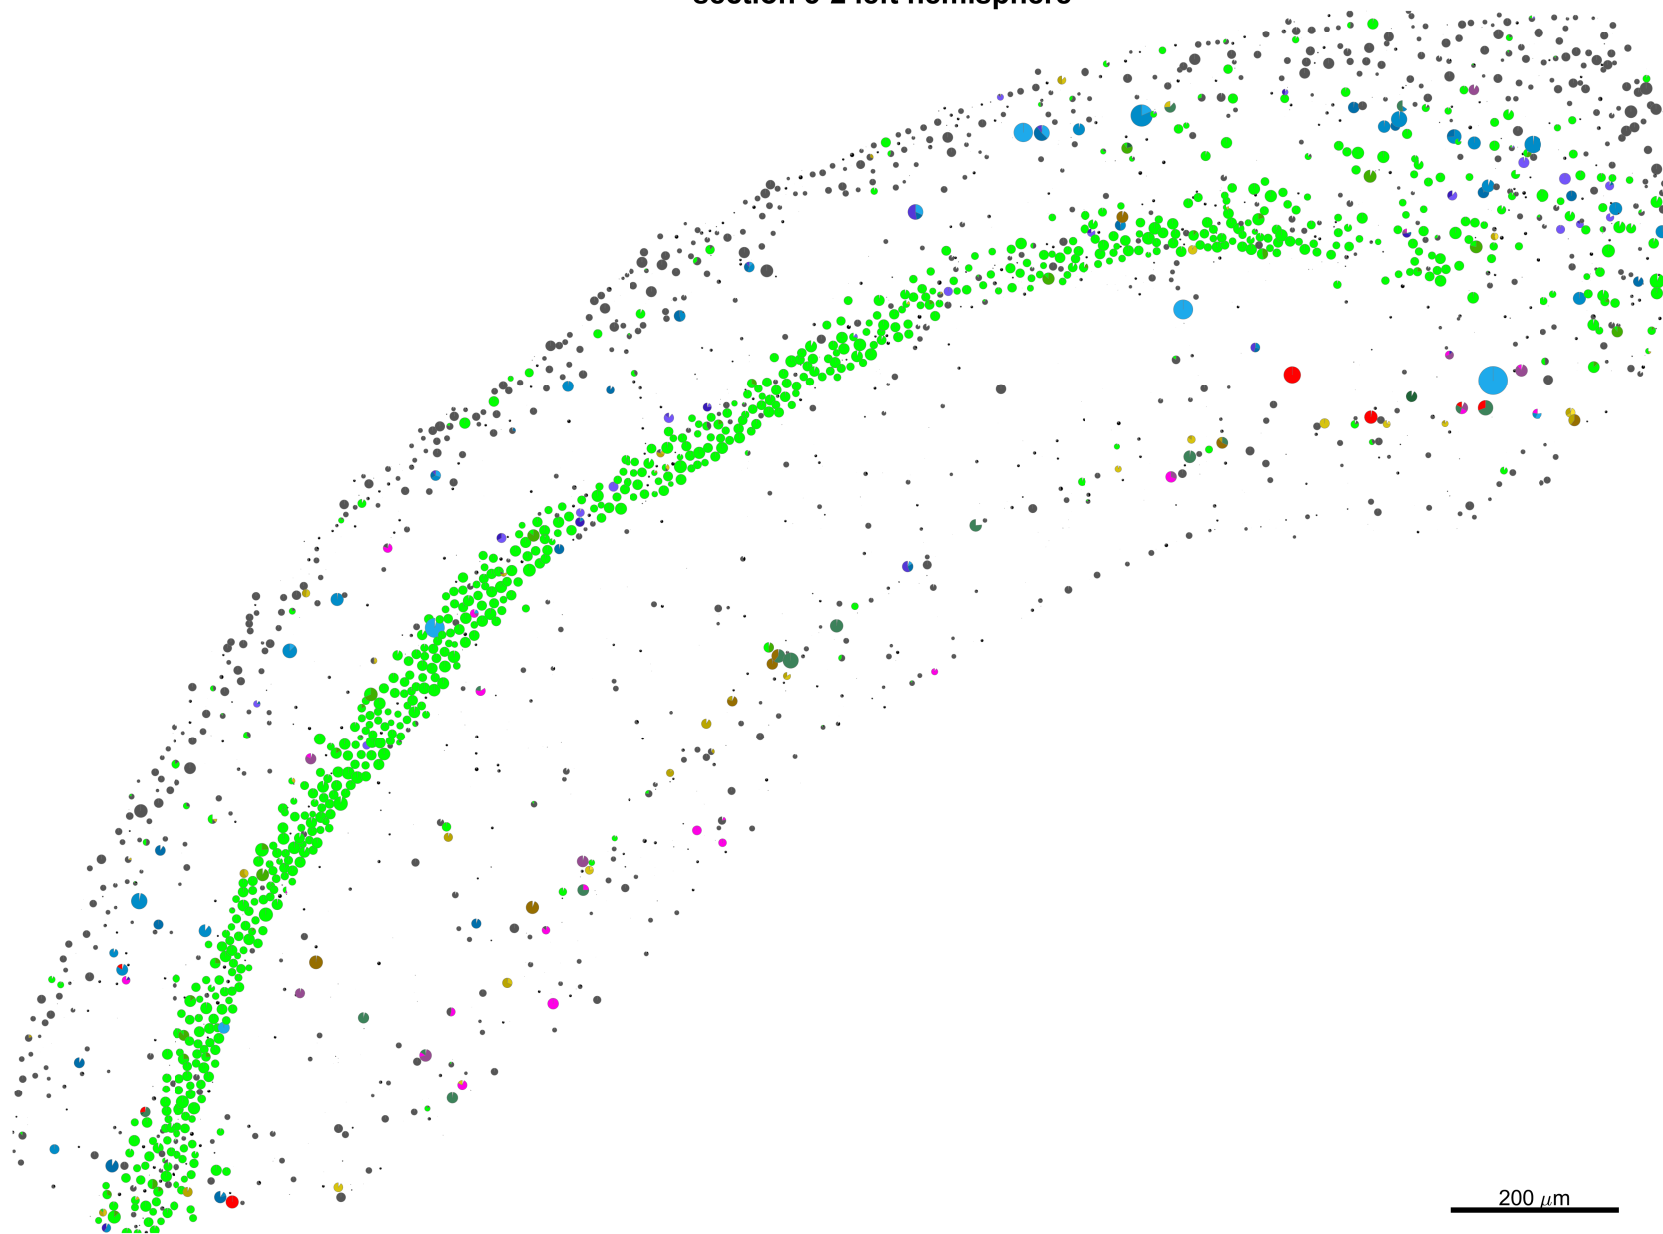

- O-Bi
- O/LM
- Hippocamposeptal
- Sst Nos1
- Axo-axonic
- Bistratified
- Basket
- MGE NGF/IVY
- CGE NGF
- Trilaminar
- Radiatum retrohip
- Cck Cxcl14+
- Cck Cxcl14-
- IS1
- IS3
- IS2
- PC CA1
- PC other
- Non neuron
- Uncalled

section 3-2 left hemisphere

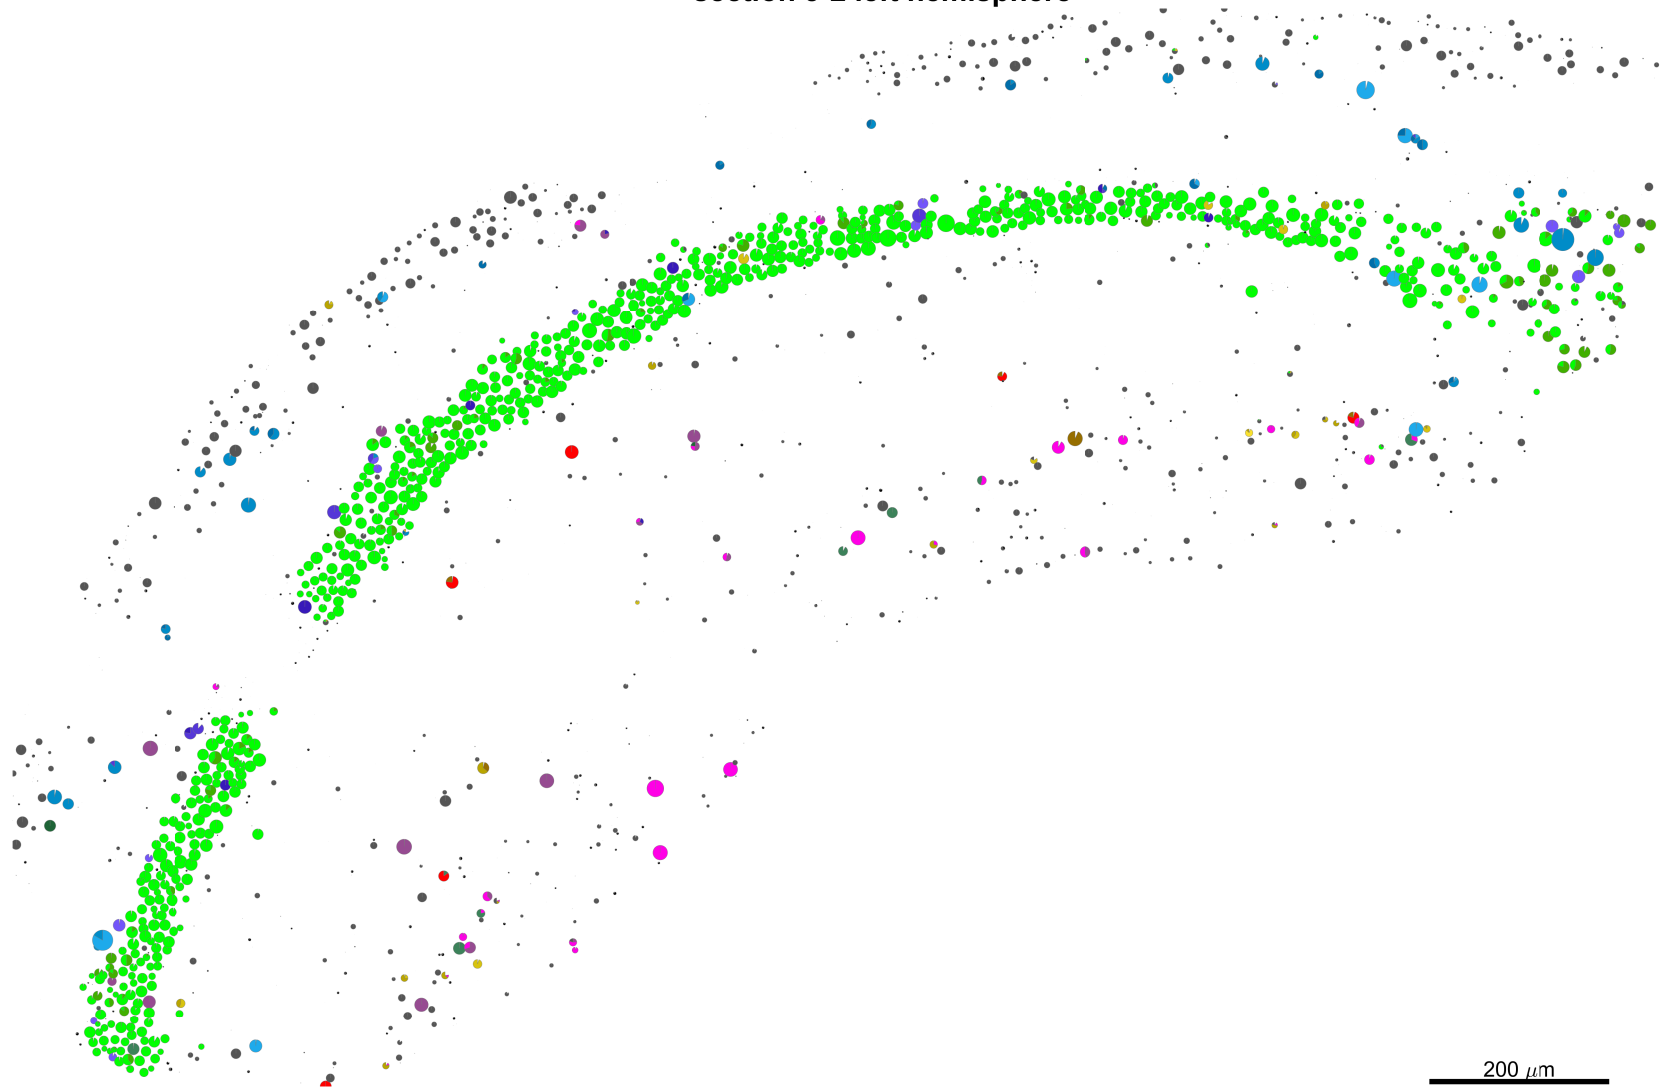

- O-Bi
- O/LM
- Hippocamoseptal
- Sst Nos1
- Axo-axonic
- Bistratified
- Basket
- MGE NGF/IVY
- CGE NGF
- Trilaminar
- Radiatum retrohip
- Cck Cxcl14+
- Cck Cxcl14-
- IS1
- IS3
- IS2
- PC CA1
- PC other
- Non neuron
- Uncalled

200  $\mu$ m

section 7-1 left hemisphere

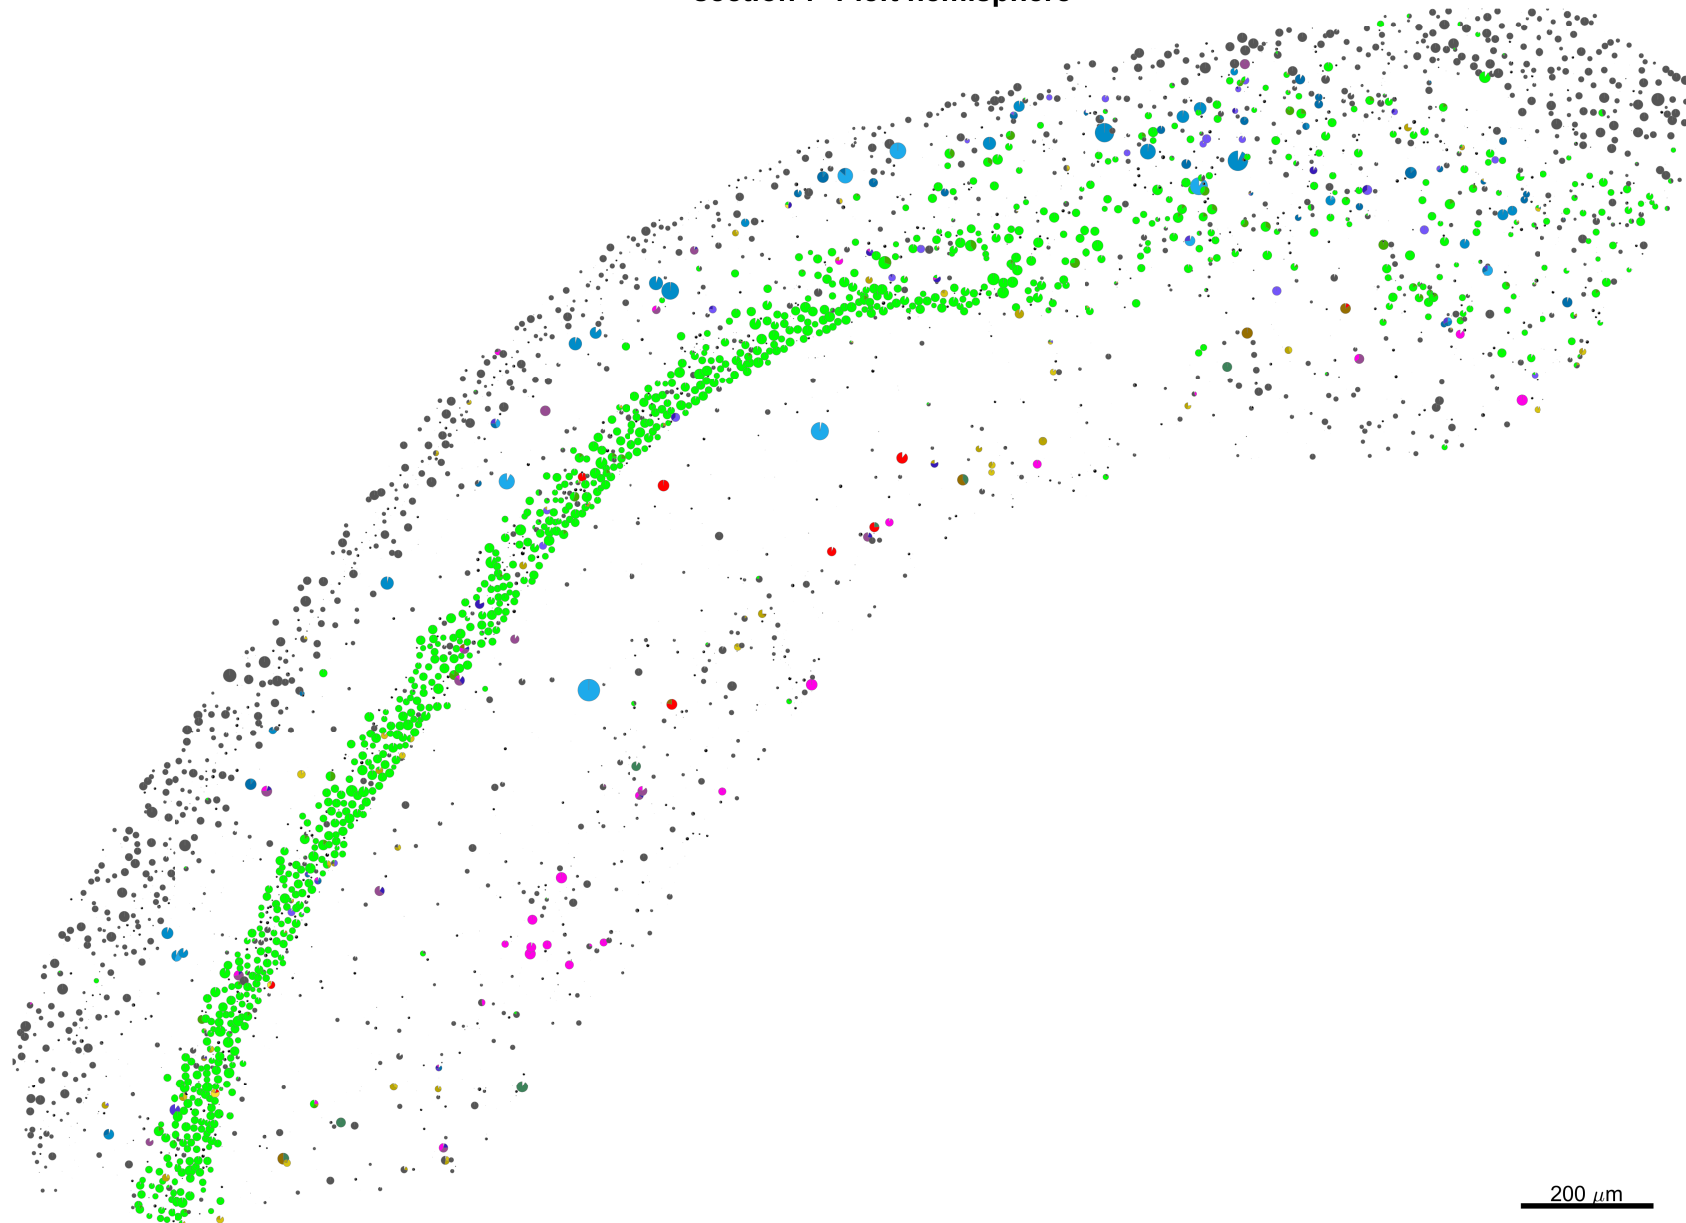

- O-Bi
- O/LM
- Hippocamposeptal
- Sst Nos1
- Axo-axonic
- Bistratified
- Basket
- MGE NGF/IVY
- CGE NGF
- Trilaminar
- Radiatum retrohip
- Cck Cxcl14+
- Cck Cxcl14-
- IS1
- IS3
- IS2
- PC CA1
- PC other
- Non neuron
- Uncalled

200  $\mu$ m

section 5-1 left hemisphere

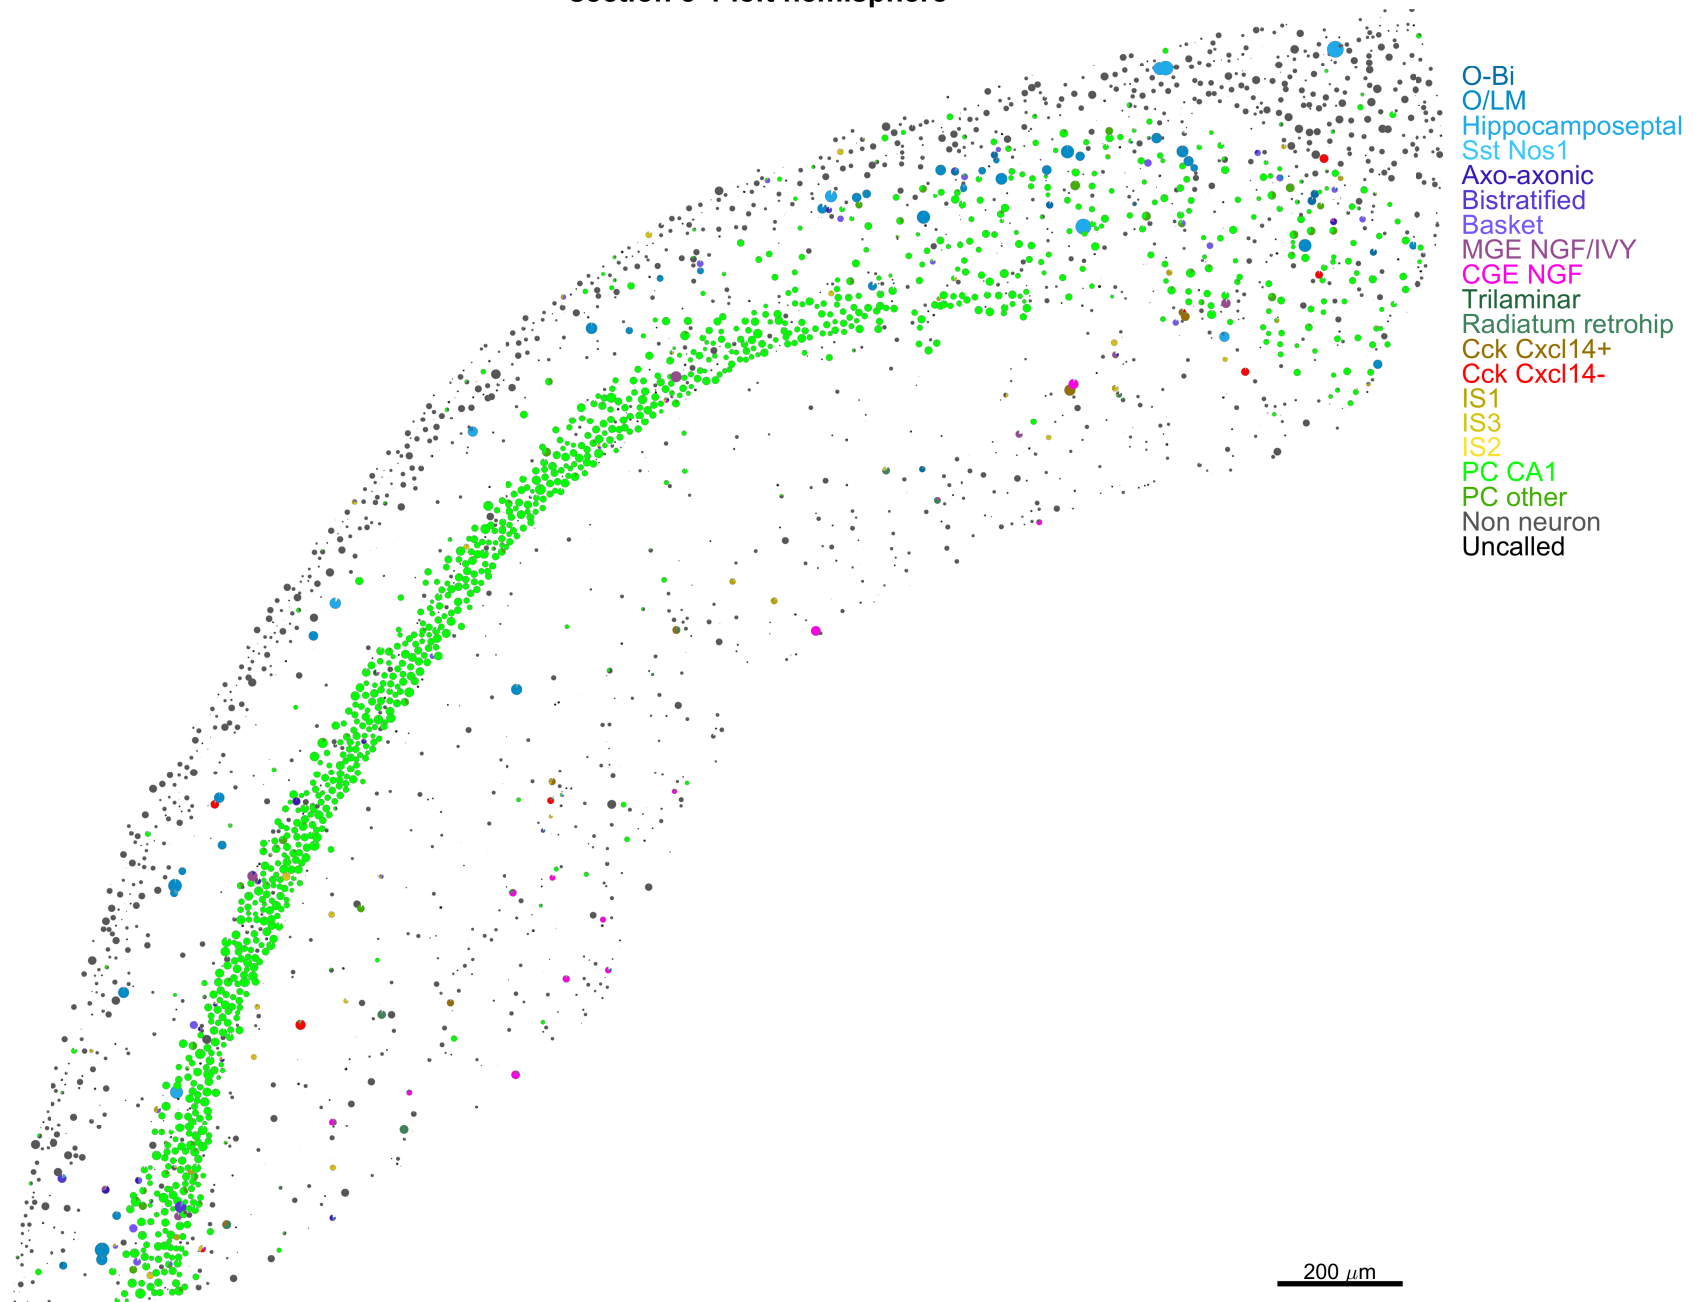

- O-Bi
- O/LM
- Hippamoseptal
- Sst Nos1
- Axo-axonic
- Bistratified
- Basket
- MGE NGF/IVY
- CGE NGF
- Trilaminar
- Radiatum retrohip
- Cck Cxcl14+
- Cck Cxcl14-
- IS1
- IS3
- IS2
- PC CA1
- PC other
- Non neuron
- Uncalled

200  $\mu$ m

section 4-1 left hemisphere

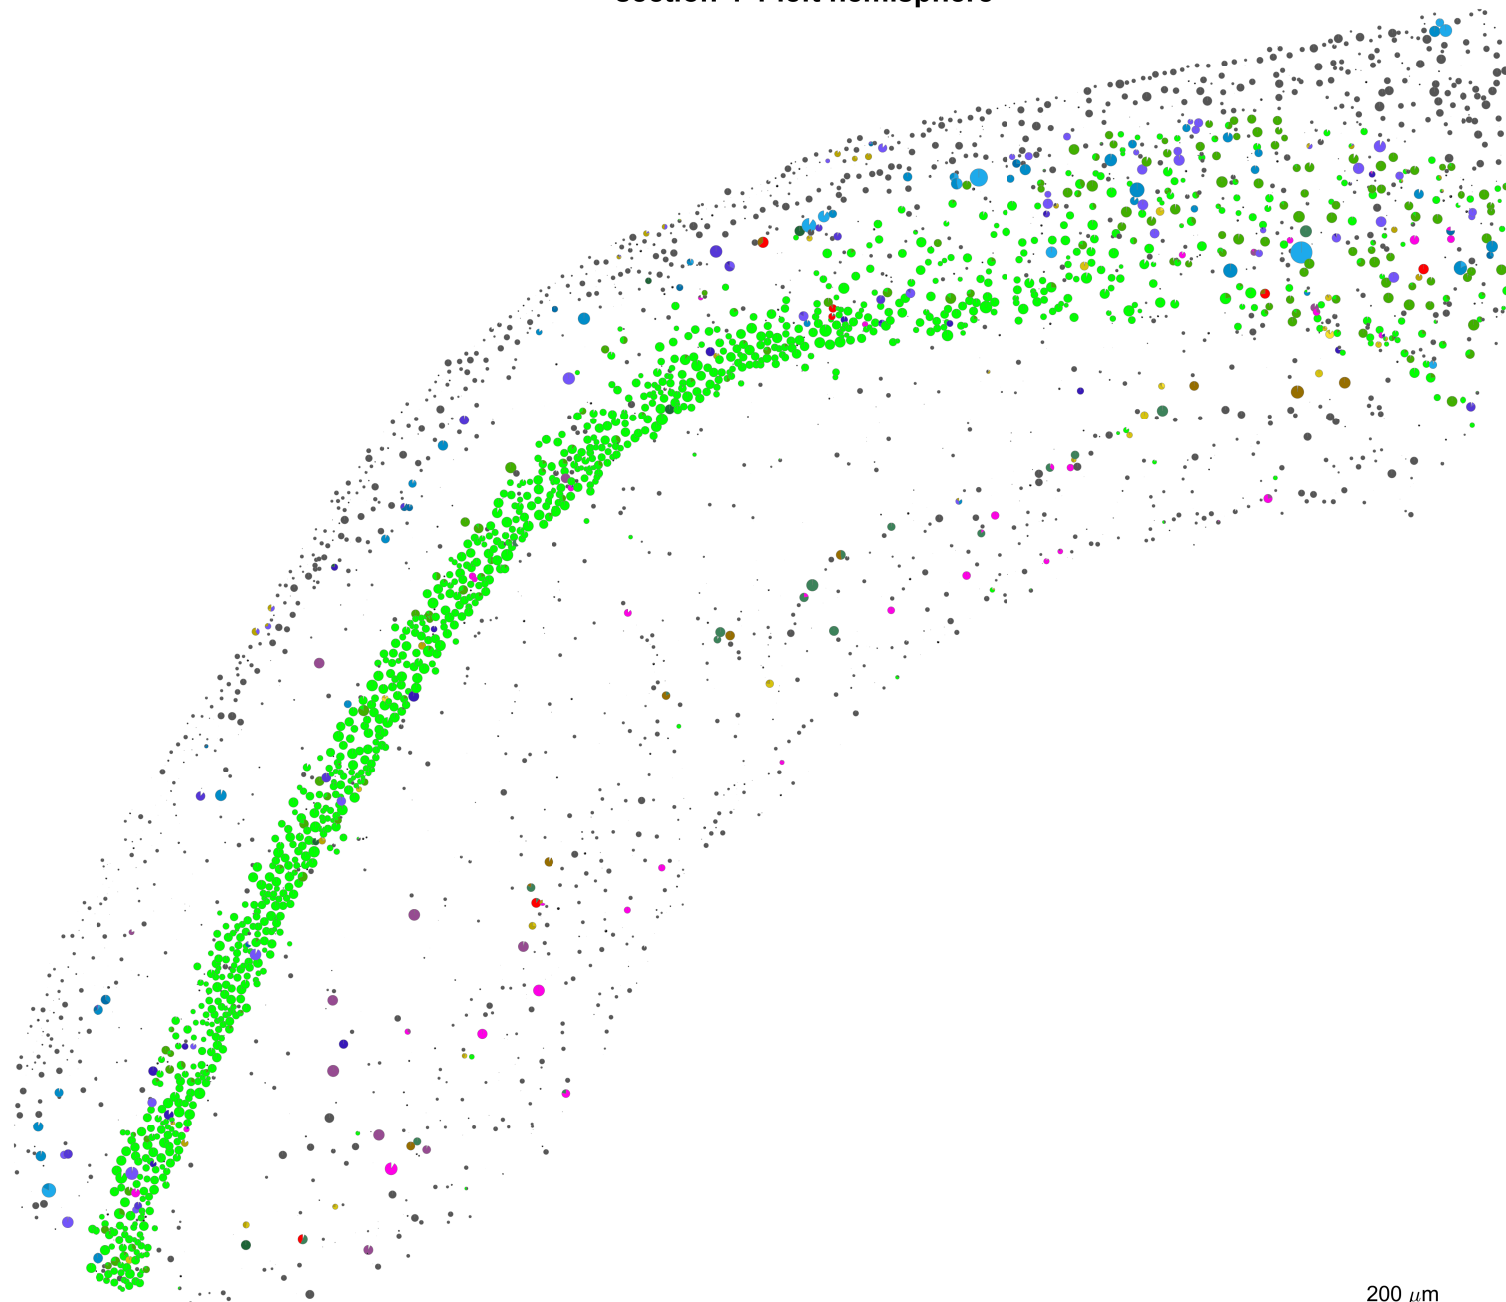

- O-Bi
- O/LM
- Hippocamptoseptal
- Sst Nos1
- Axo-axonic
- Bistratified
- Basket
- MGE NGF/IVY
- CGE NGF
- Trilaminar
- Radiatum retrohip
- Cck Cxcl14+
- Cck Cxcl14-
- IS1
- IS3
- IS2
- PC CA1
- PC other
- Non neuron
- Uncalled

200  $\mu$ m

section 3-1 left hemisphere

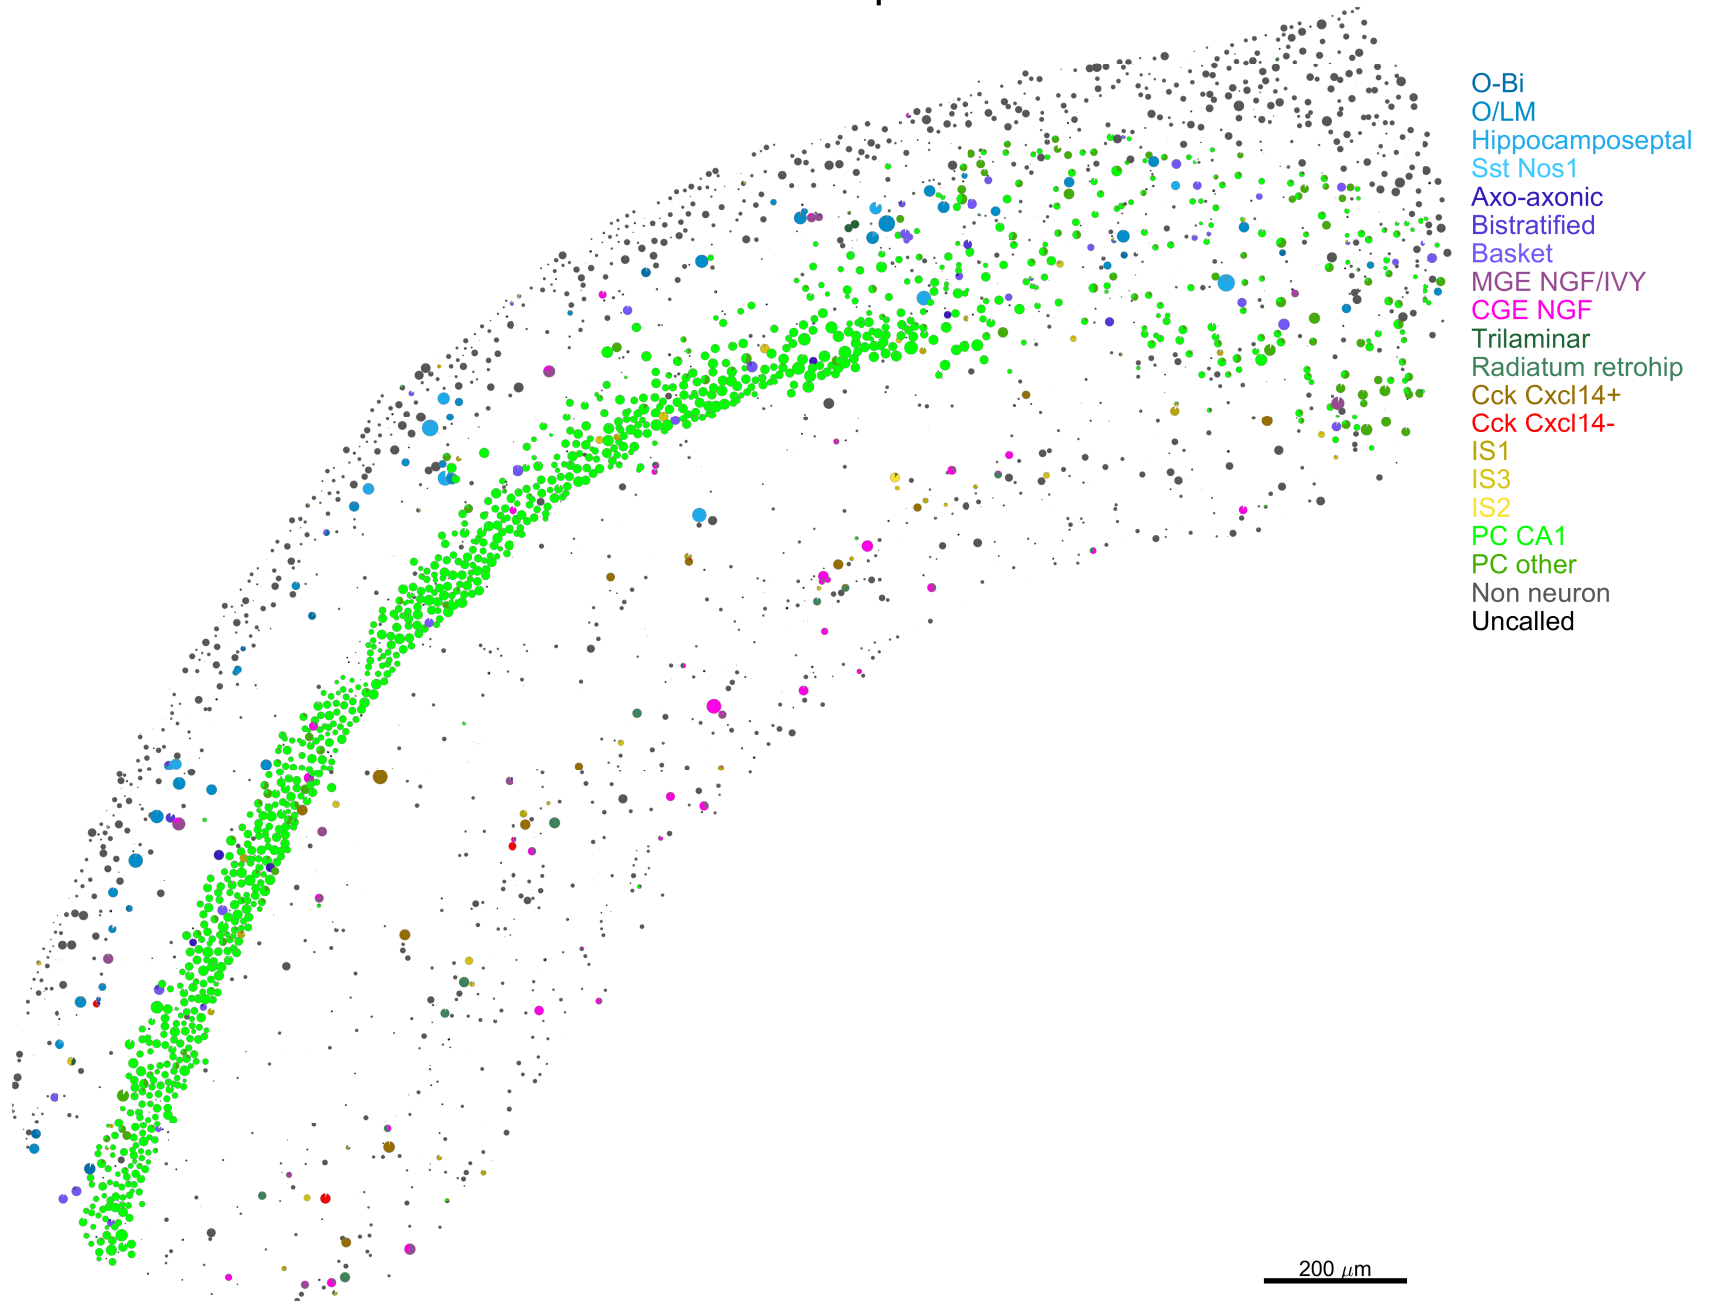

section 7-4 right hemisphere

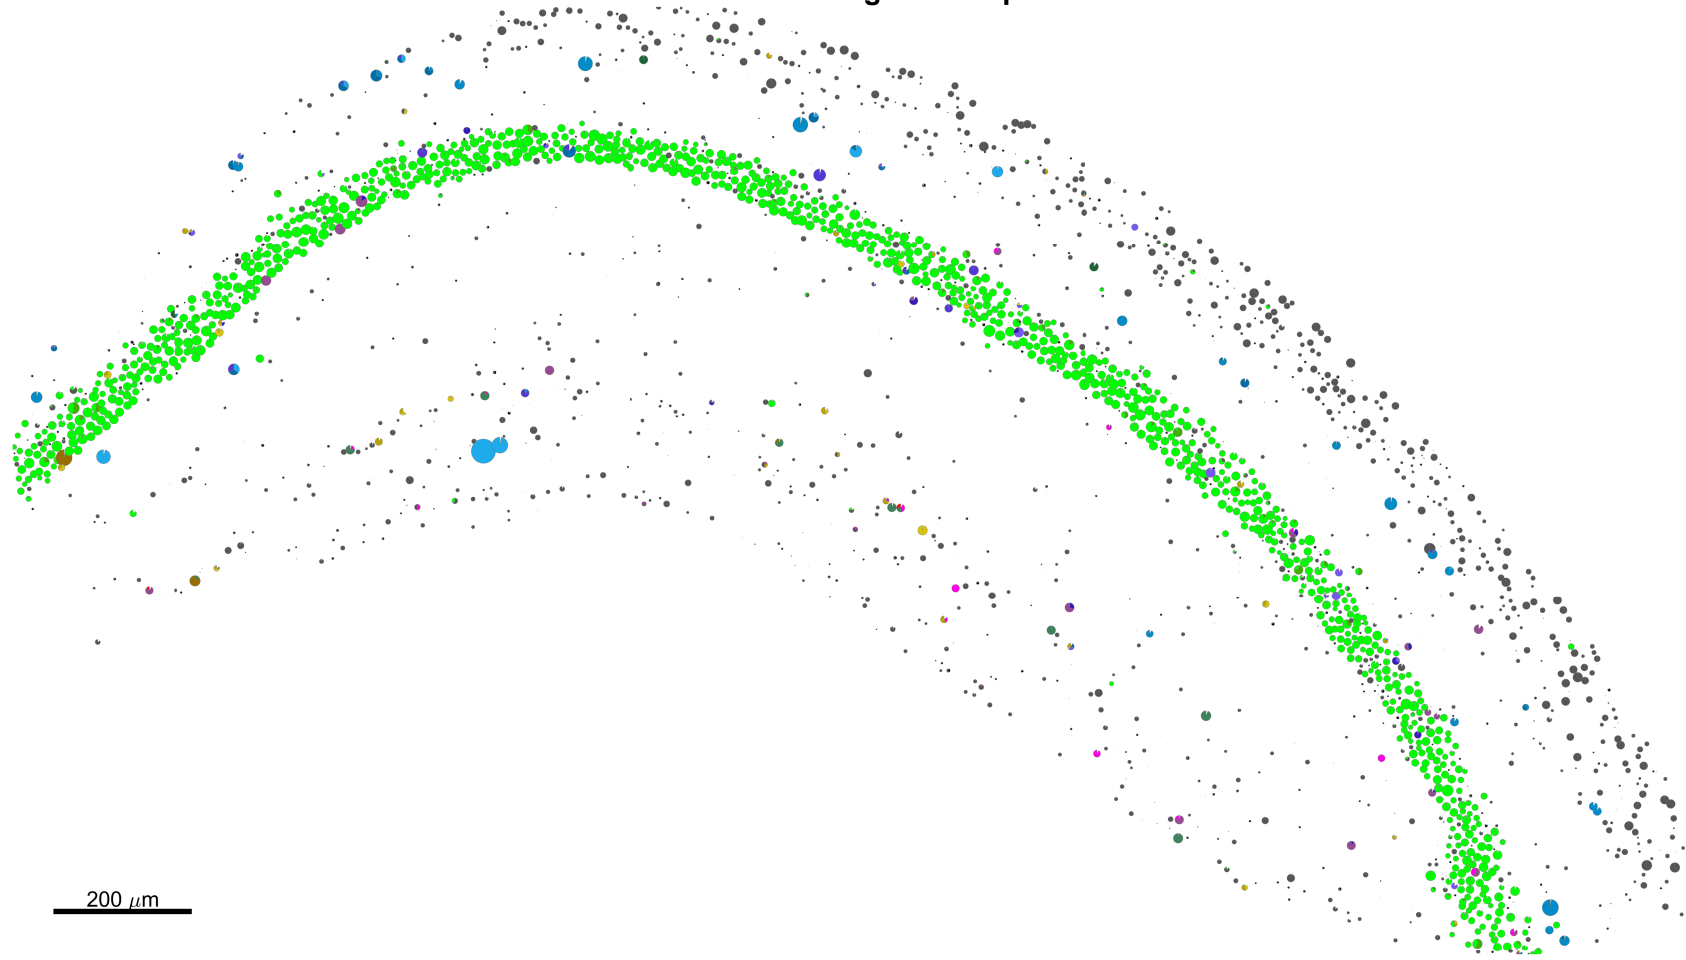

- O-Bi
- O/LM
- Hippocamposeptal
- Sst Nos1
- Axo-axonic
- Bistratified
- Basket
- MGE NGF/IVY
- CGE NGF
- Trilaminar
- Radiatum retrohip
- Cck Cxcl14+
- Cck Cxcl14-
- IS1
- IS3
- IS2
- PC CA1
- PC other
- Non neuron
- Uncalled

200  $\mu$ m

section 5-4 right hemisphere

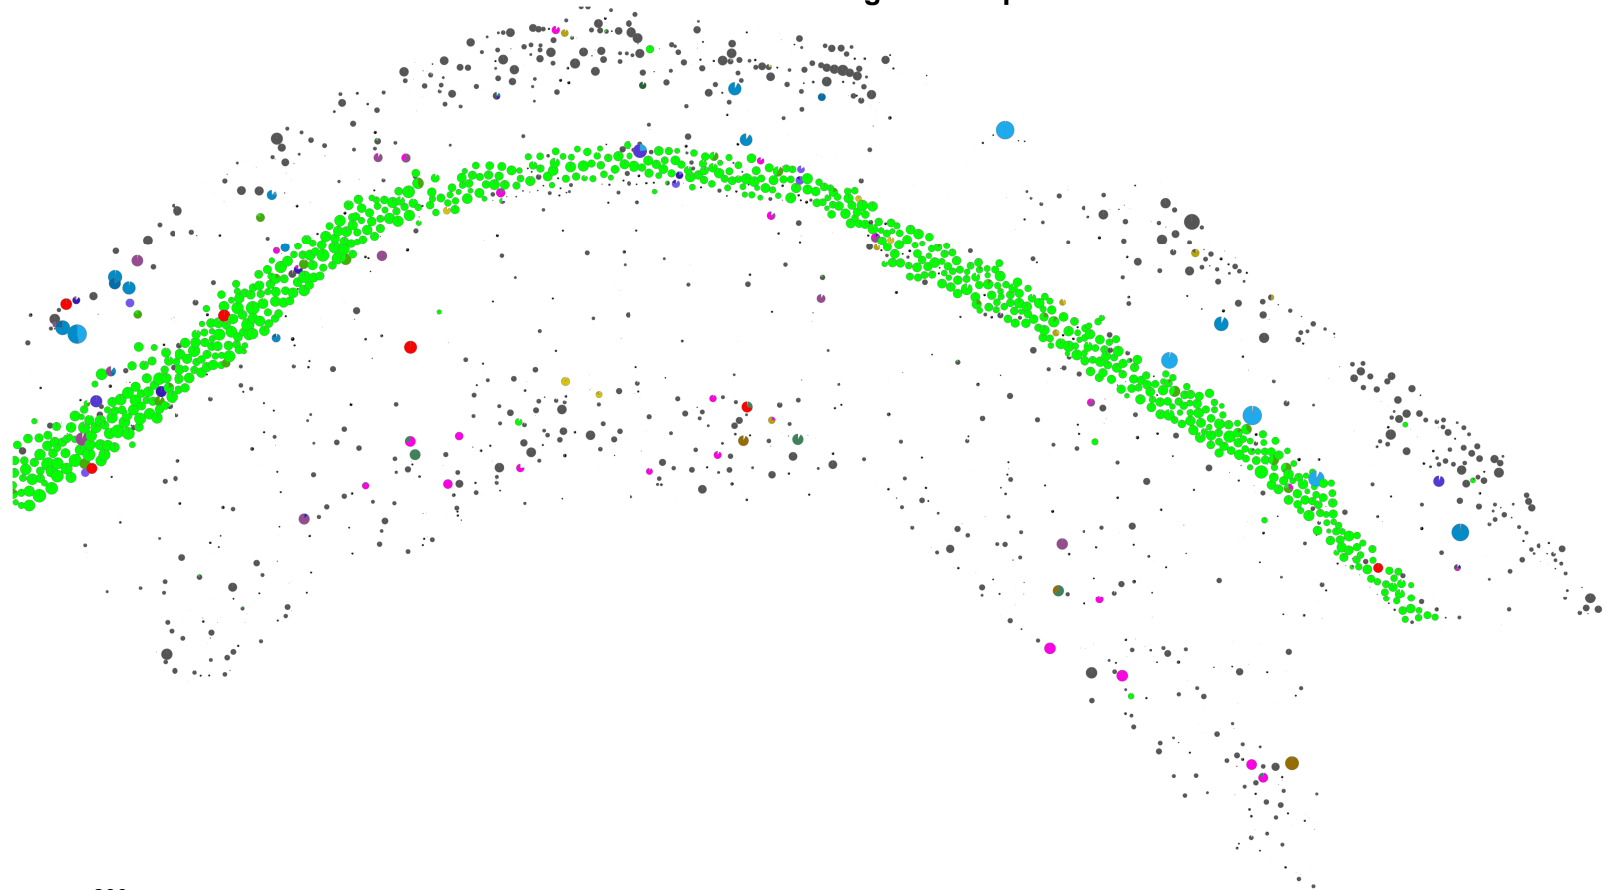

- O-Bi
- O/LM
- Hippocamptoseptal
- Sst Nos1
- Axo-axonic
- Bistratified
- Basket
- MGE NGF/IVY
- CGE NGF
- Trilaminar
- Radiatum retrohip
- Cck Cxcl14+
- Cck Cxcl14-
- IS1
- IS3
- IS2
- PC CA1
- PC other
- Non neuron
- Uncalled

200  $\mu$ m



section 3-4 right hemisphere

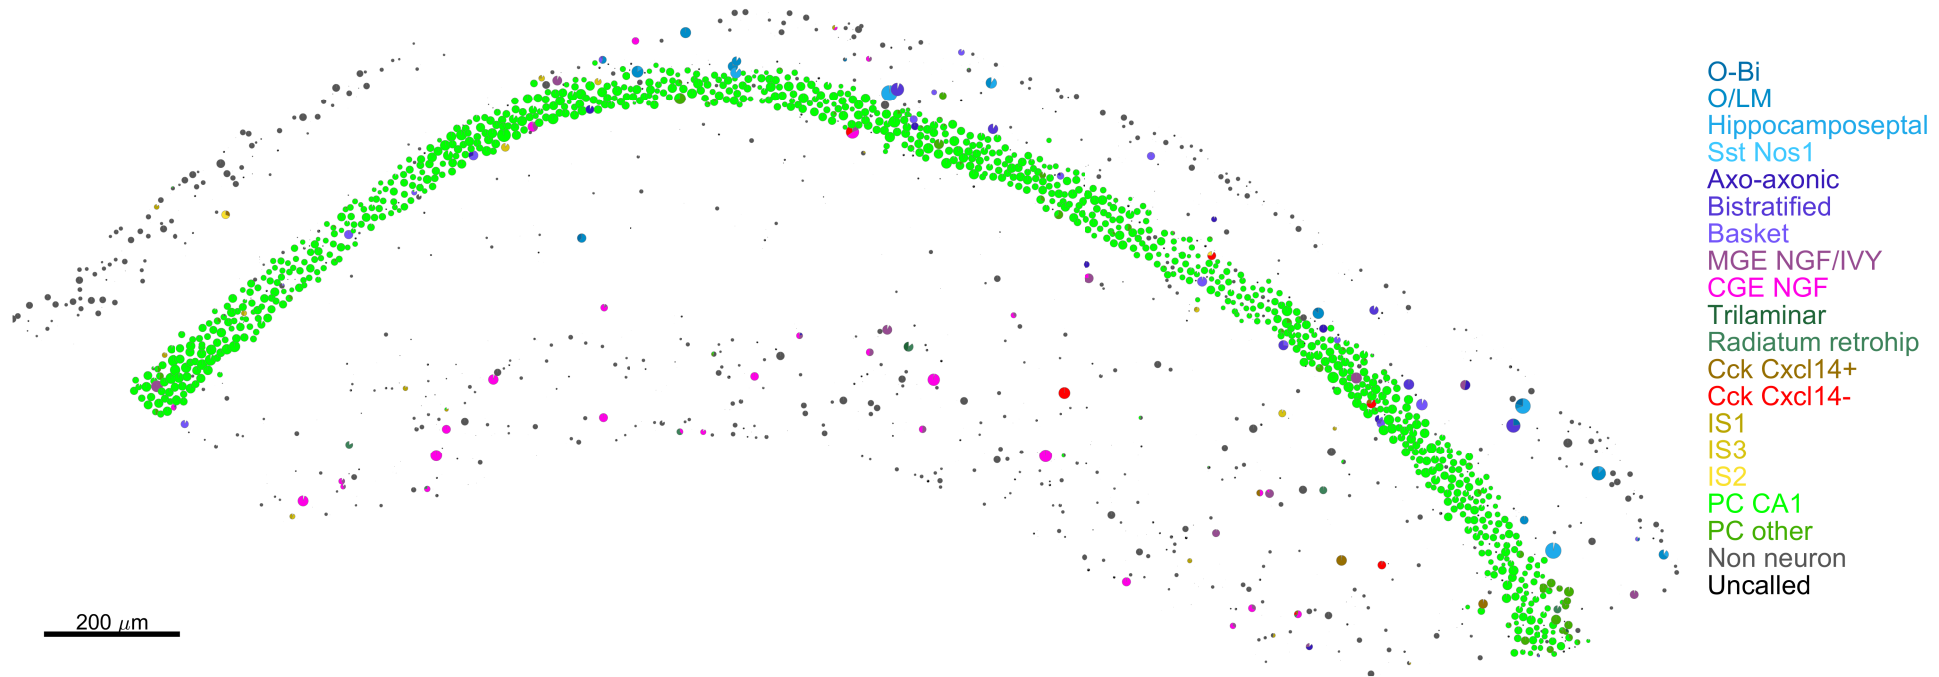

section 7-3 right hemisphere

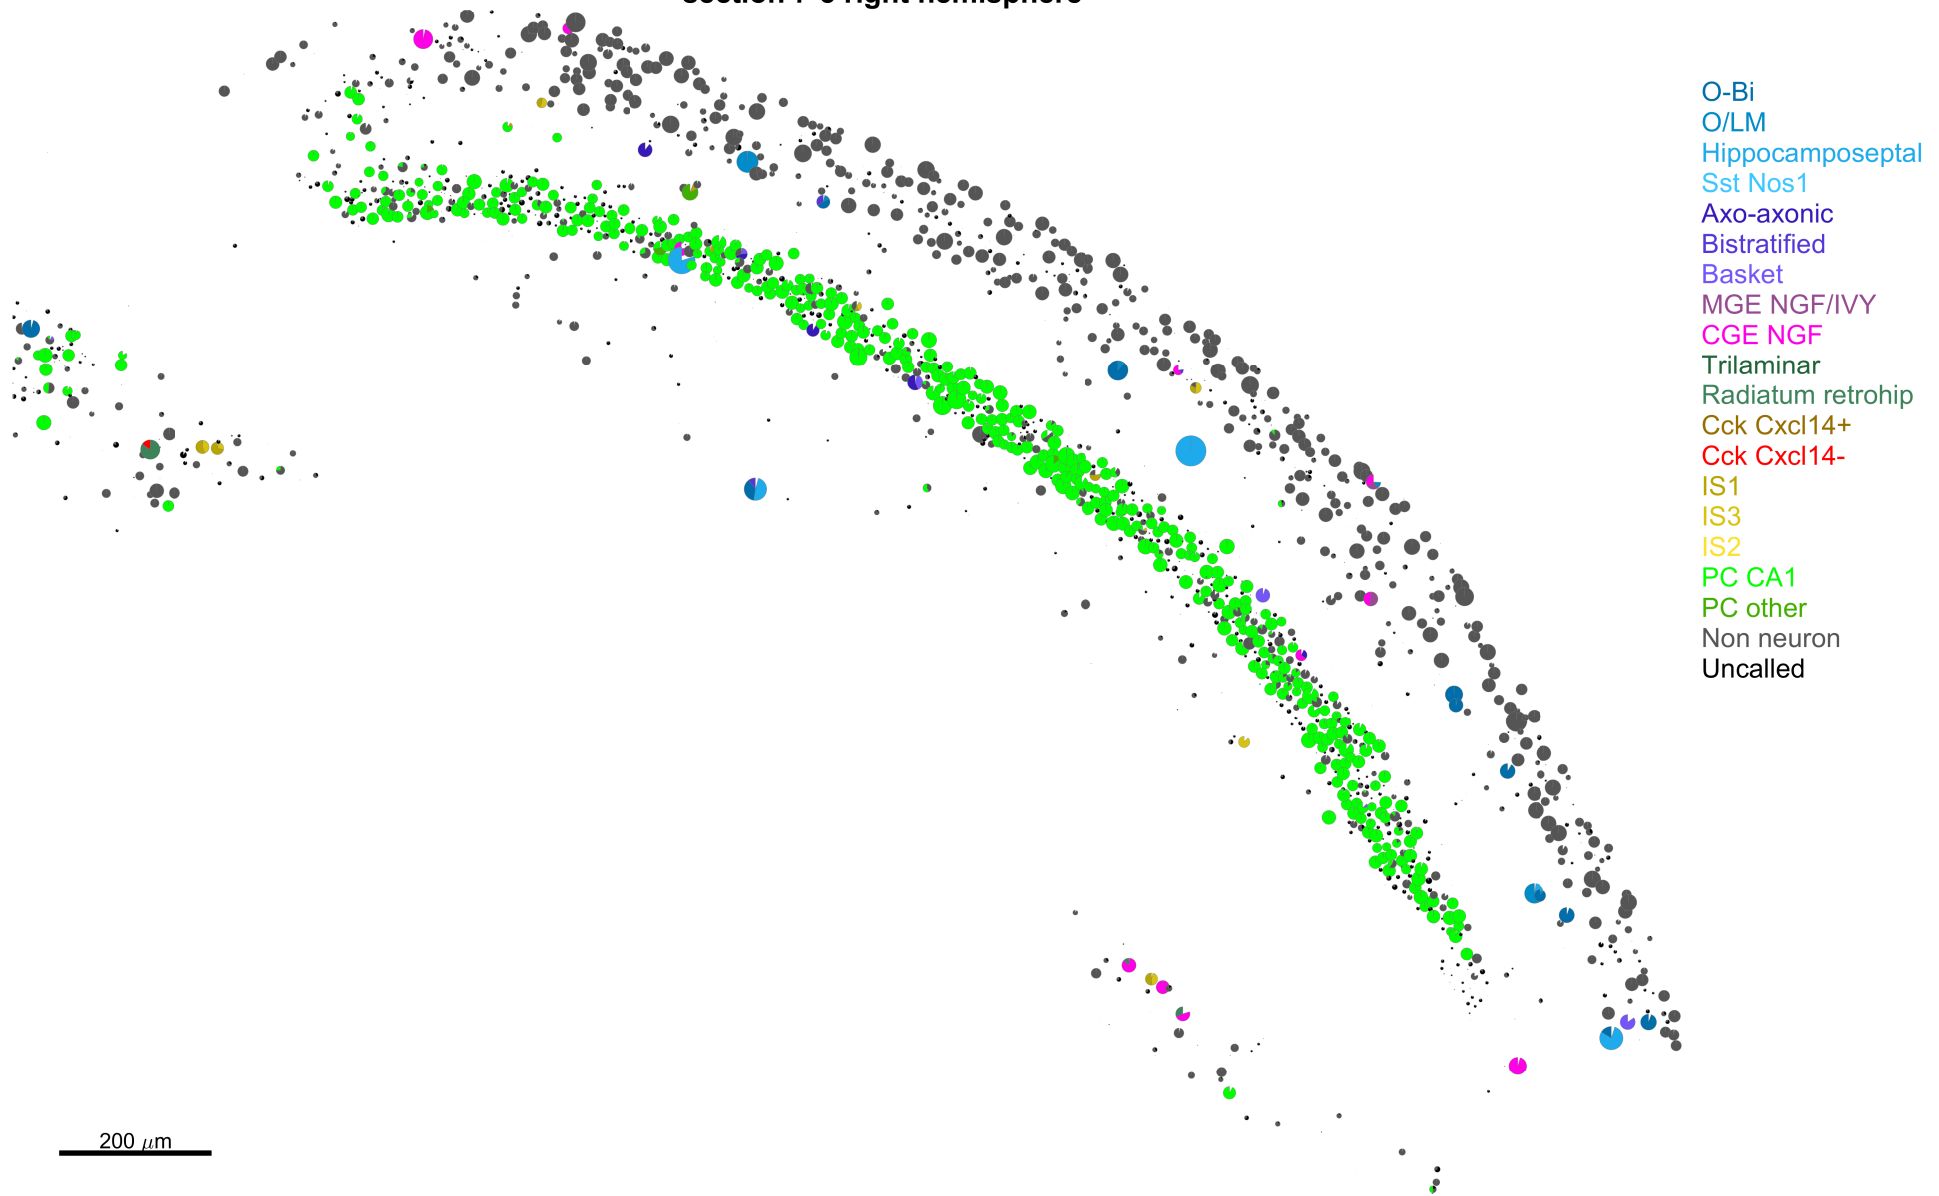

section 5-3 right hemisphere

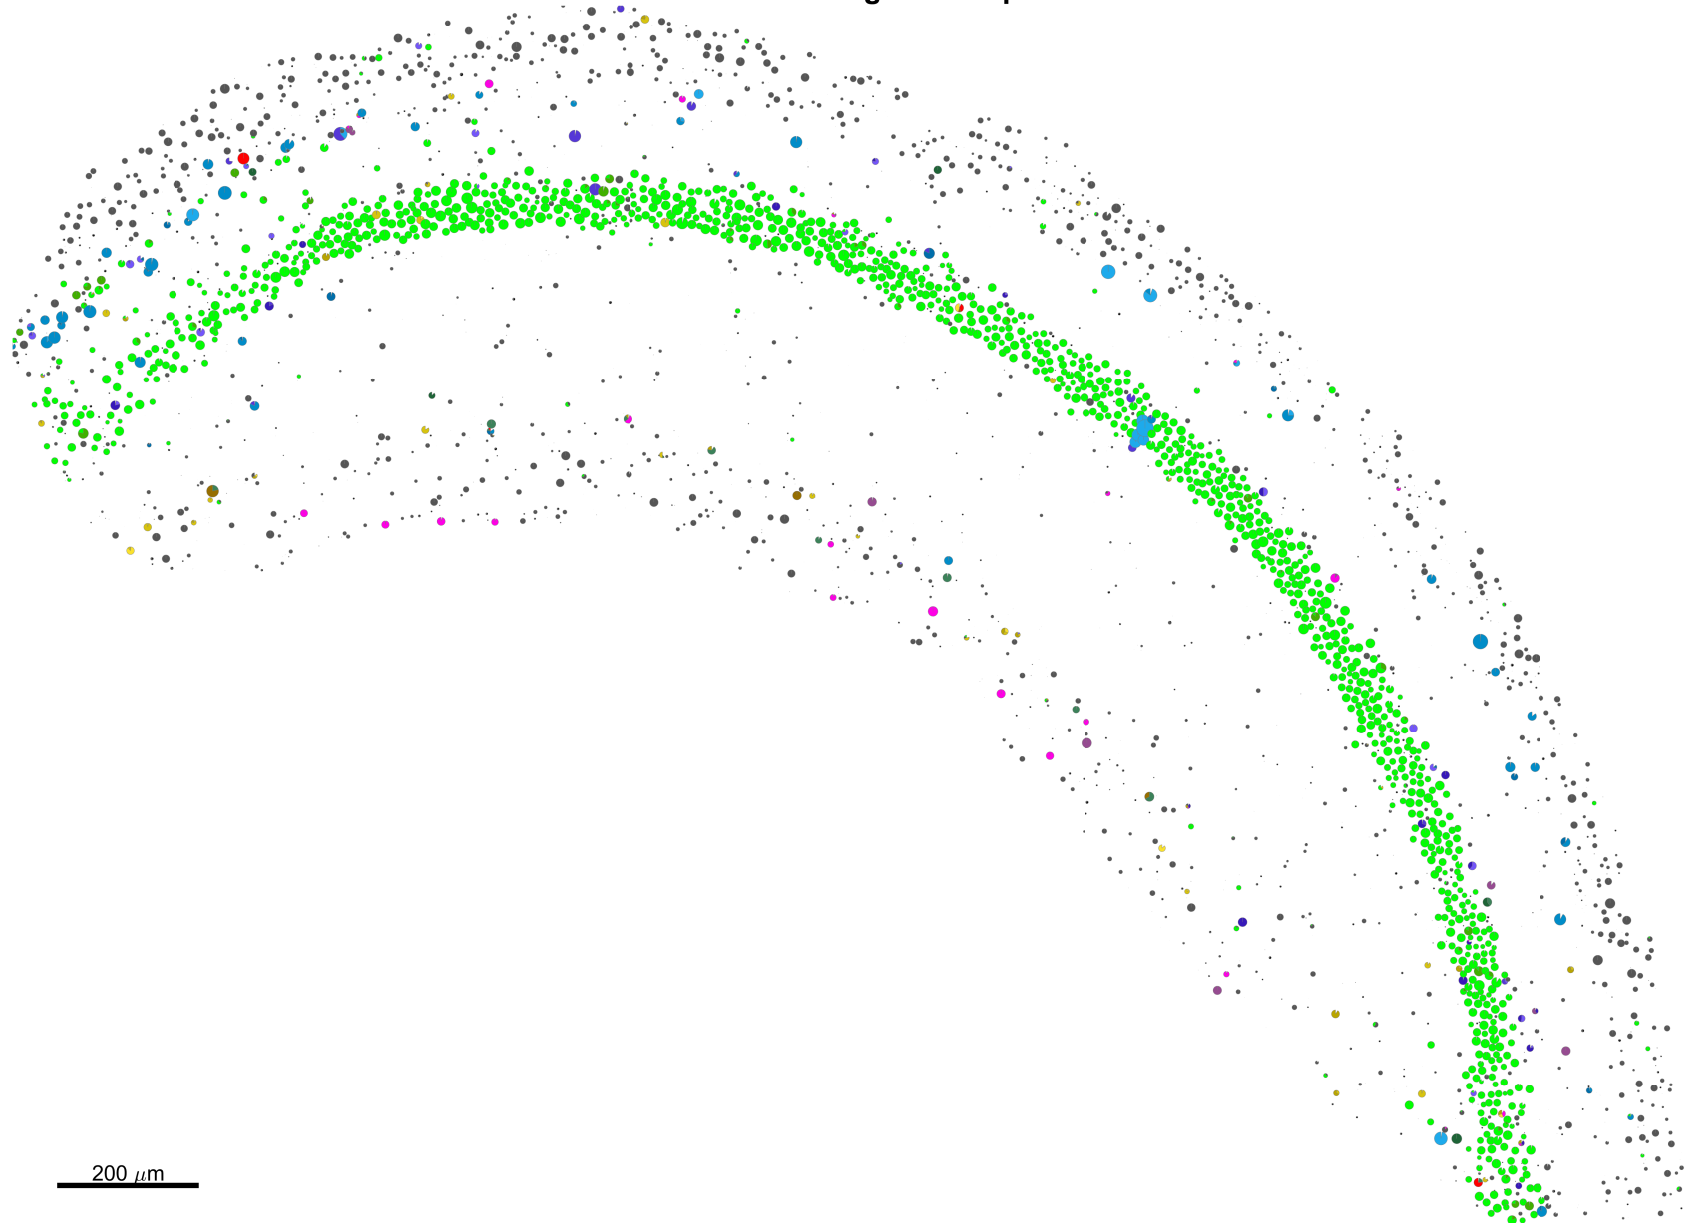

- O-Bi
- O/LM
- Hippocamptoseptal
- Sst Nos1
- Axo-axonic
- Bistratified
- Basket
- MGE NGF/IVY
- CGE NGF
- Trilaminar
- Radiatum retrohip
- Cck Cxcl14+
- Cck Cxcl14-
- IS1
- IS3
- IS2
- PC CA1
- PC other
- Non neuron
- Uncalled

200  $\mu$ m

section 4-3 right hemisphere

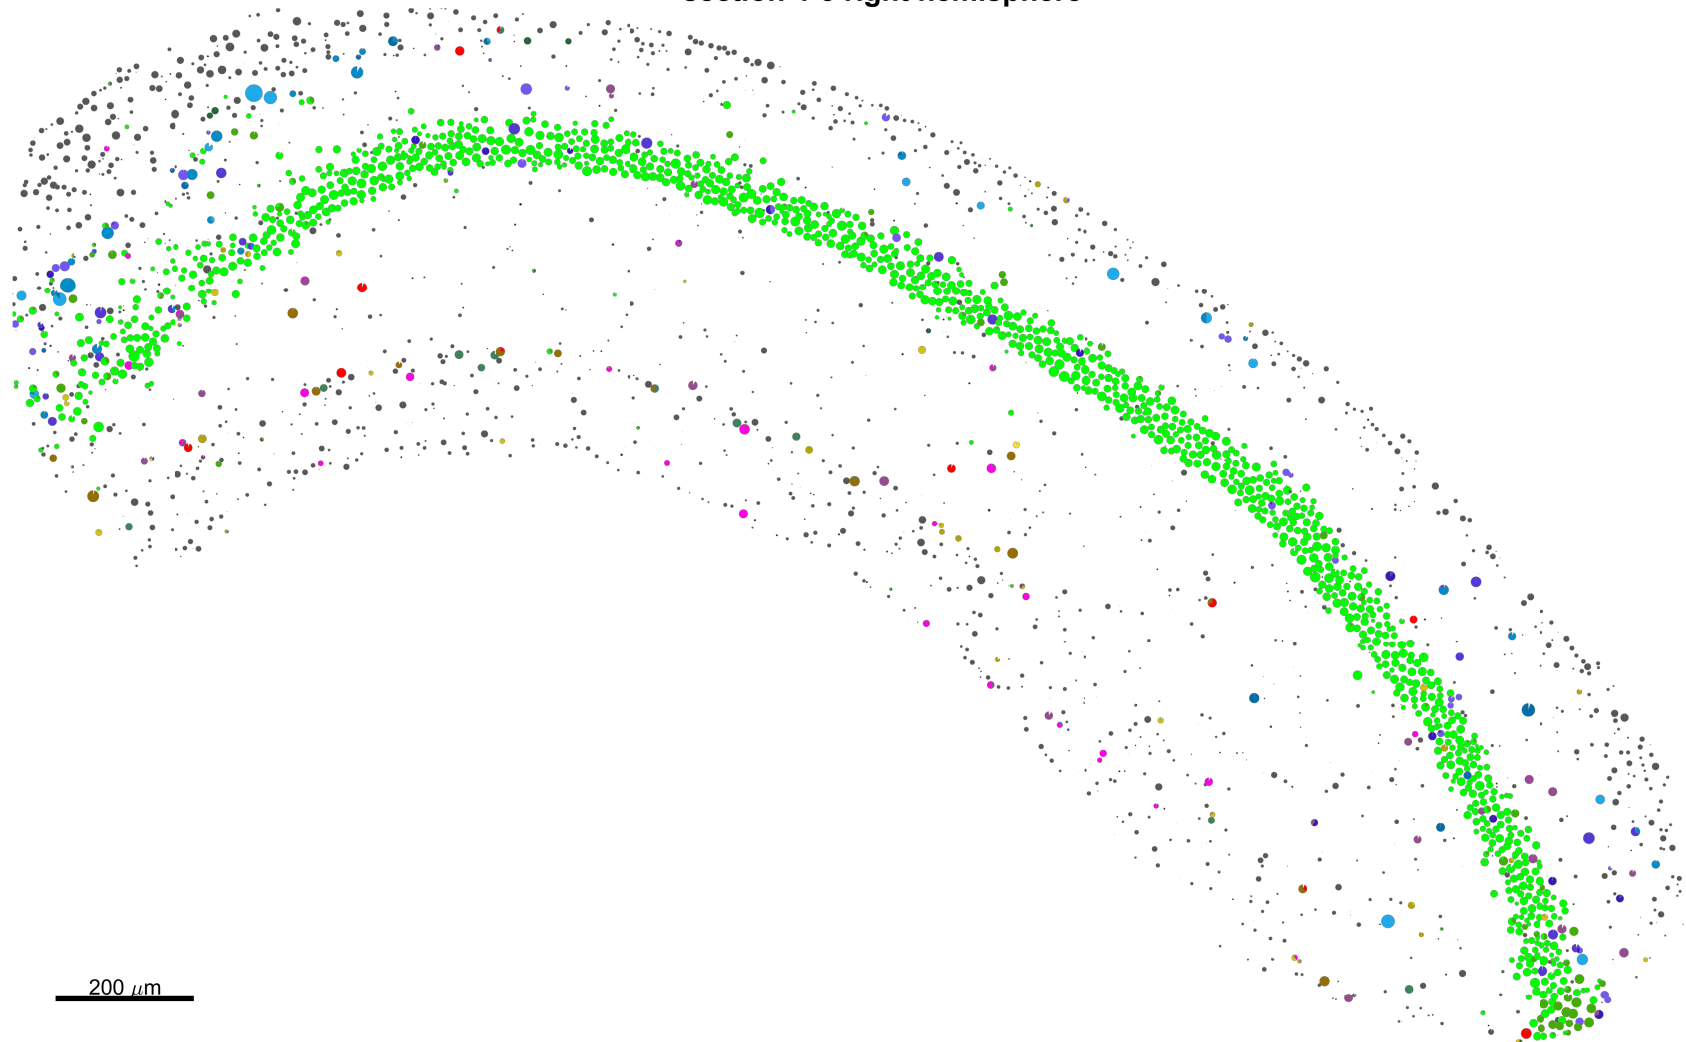

- O-Bi
- O/LM
- Hippocamptoseptal
- Sst Nos1
- Axo-axonic
- Bistratified
- Basket
- MGE NGF/IVY
- CGE NGF
- Trilaminar
- Radiatum retrohip
- Cck Cxcl14+
- Cck Cxcl14-
- IS1
- IS3
- IS2
- PC CA1
- PC other
- Non neuron
- Uncalled

section 3-3 right hemisphere

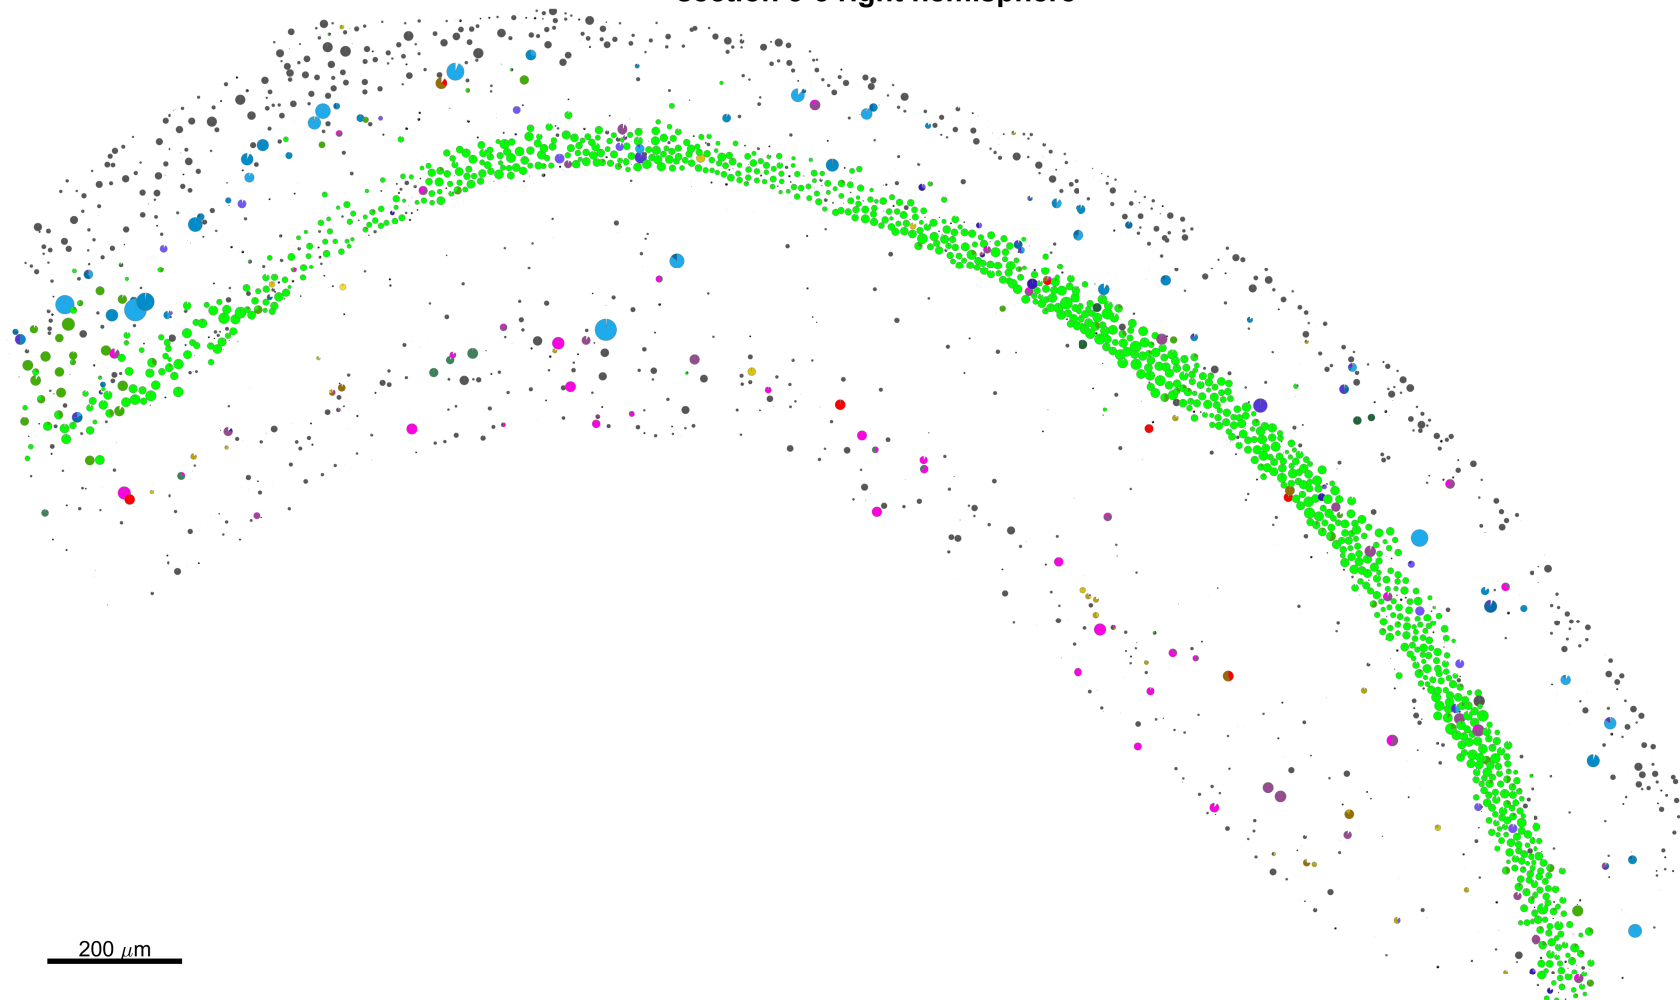

- O-Bi
- O/LM
- Hippamoseptal
- Sst Nos1
- Axo-axonic
- Bistratified
- Basket
- MGE NGF/IVY
- CGE NGF
- Trilaminar
- Radiatum retrohip
- Cck Cxcl14+
- Cck Cxcl14-
- IS1
- IS3
- IS2
- PC CA1
- PC other
- Non neuron
- Uncalled

200  $\mu$ m

section 7-2 right hemisphere

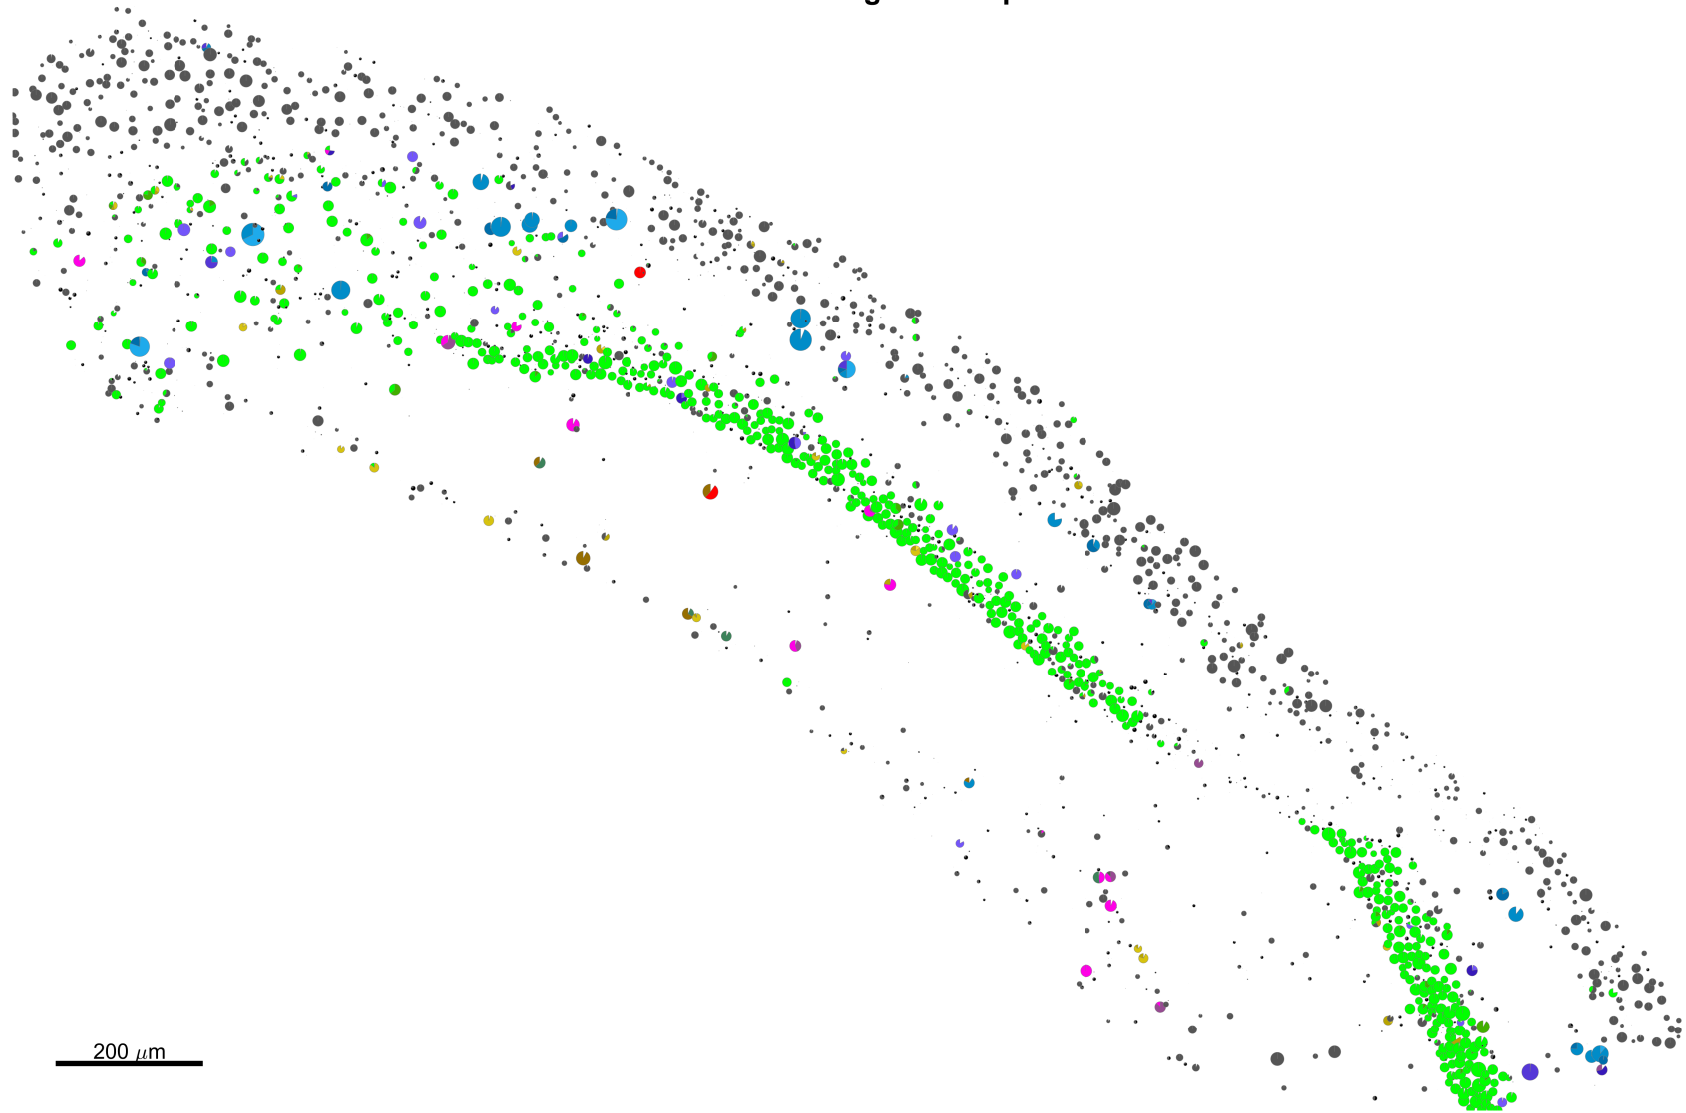

- O-Bi
- O/LM
- Hippocamposeptal
- Sst Nos1
- Axo-axonic
- Bistratified
- Basket
- MGE NGF/IVY
- CGE NGF
- Trilaminar
- Radiatum retrohip
- Cck Cxcl14+
- Cck Cxcl14-
- IS1
- IS3
- IS2
- PC CA1
- PC other
- Non neuron
- Uncalled

section 5-2 right hemisphere

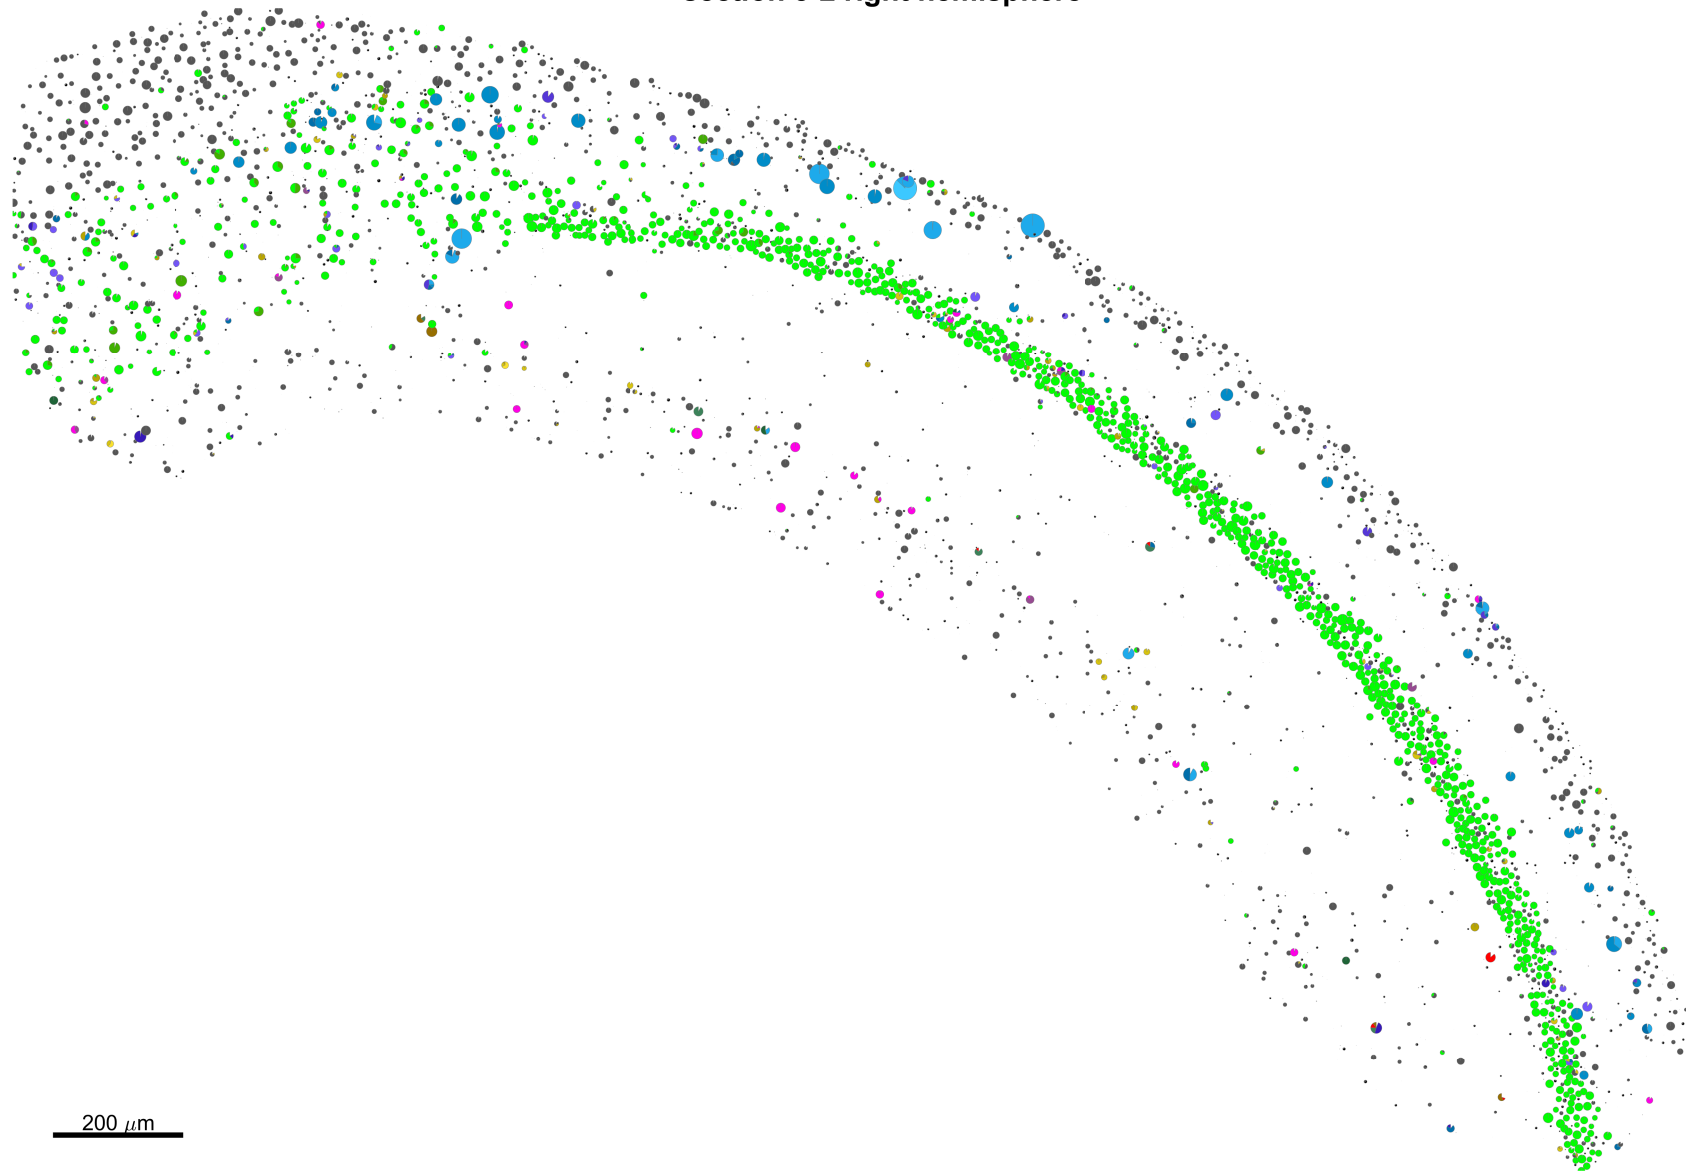

- O-Bi
- O/LM
- Hippocamptoseptal
- Sst Nos1
- Axo-axonic
- Bistratified
- Basket
- MGE NGF/IVY
- CGE NGF
- Trilaminar
- Radiatum retrohip
- Cck Cxcl14+
- Cck Cxcl14-
- IS1
- IS3
- IS2
- PC CA1
- PC other
- Non neuron
- Uncalled

200  $\mu$ m

section 3-2 right hemisphere

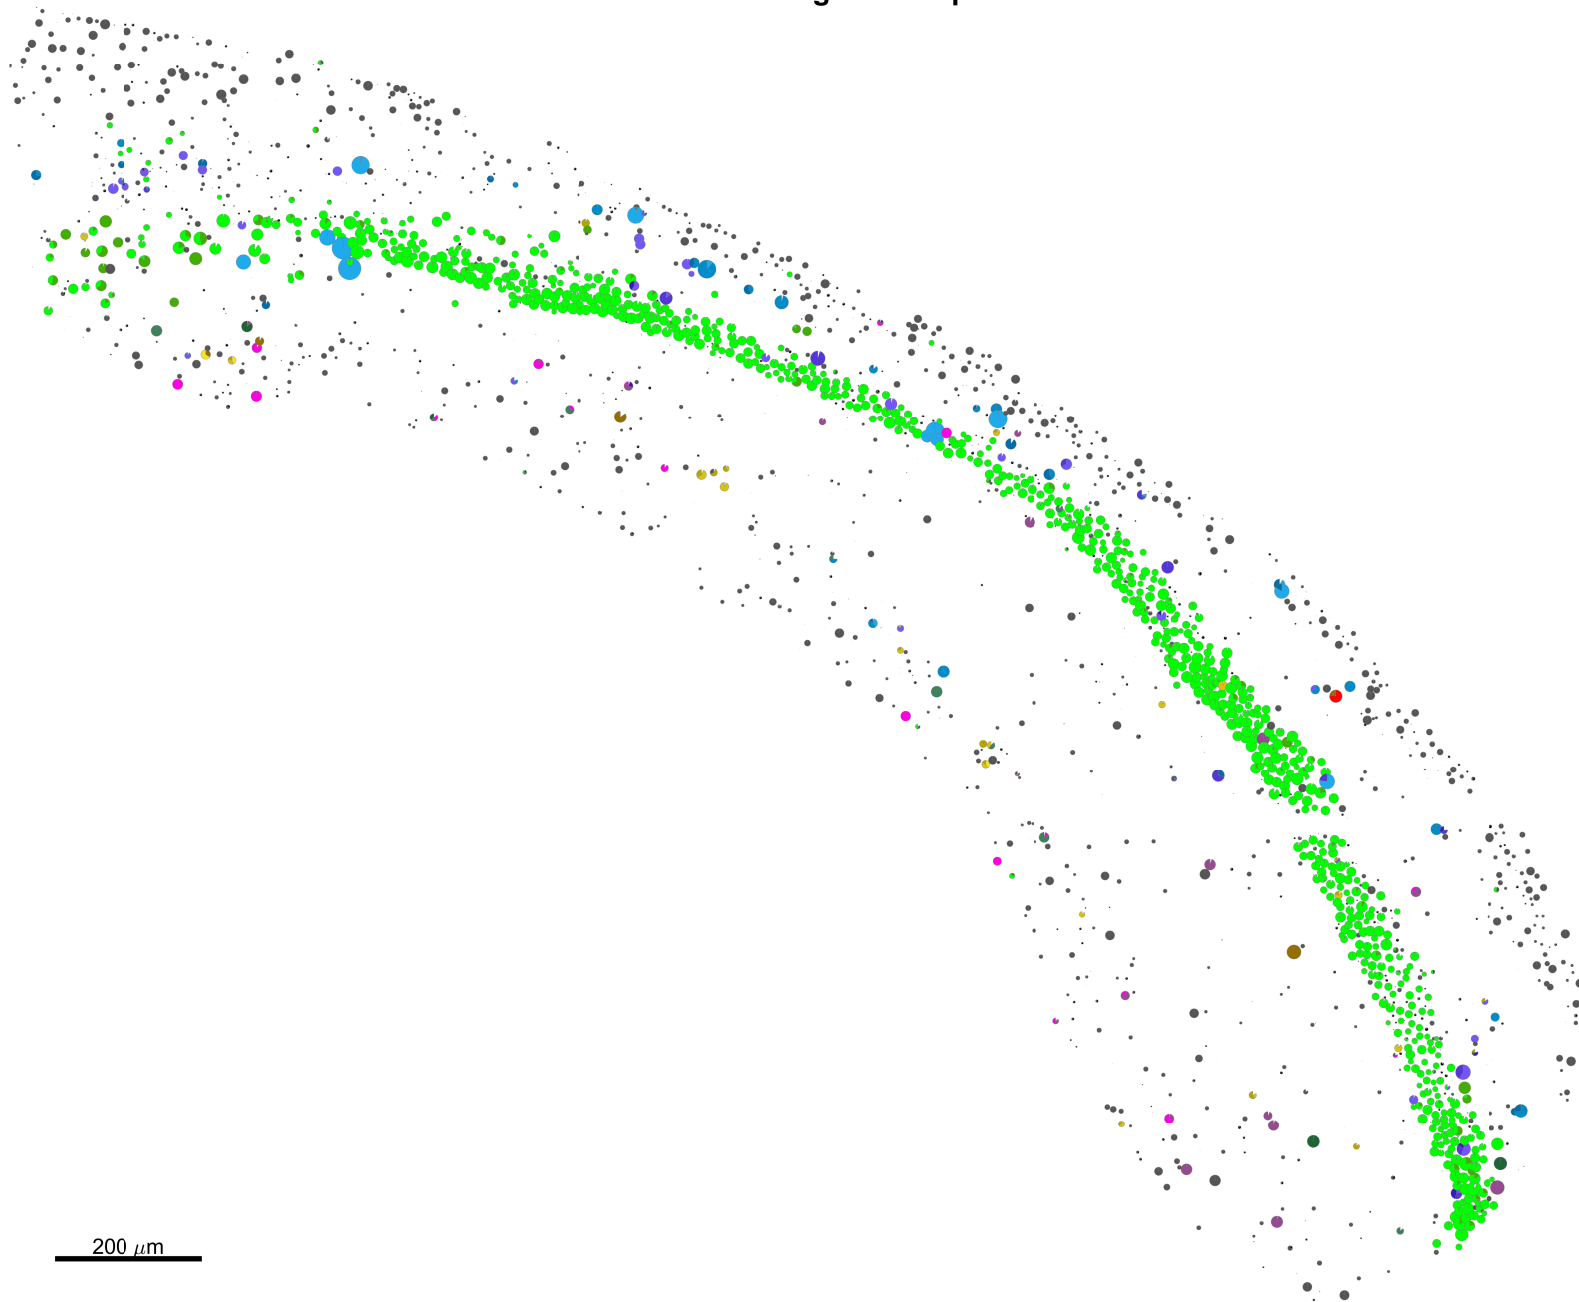

- O-Bi
- O/LM
- Hippocamptoseptal
- Sst Nos1
- Axo-axonic
- Bistratified
- Basket
- MGE NGF/IVY
- CGE NGF
- Trilaminar
- Radiatum retrohip
- Cck Cxcl14+
- Cck Cxcl14-
- IS1
- IS3
- IS2
- PC CA1
- PC other
- Non neuron
- Uncalled

200  $\mu$ m



section 7-1 right hemisphere

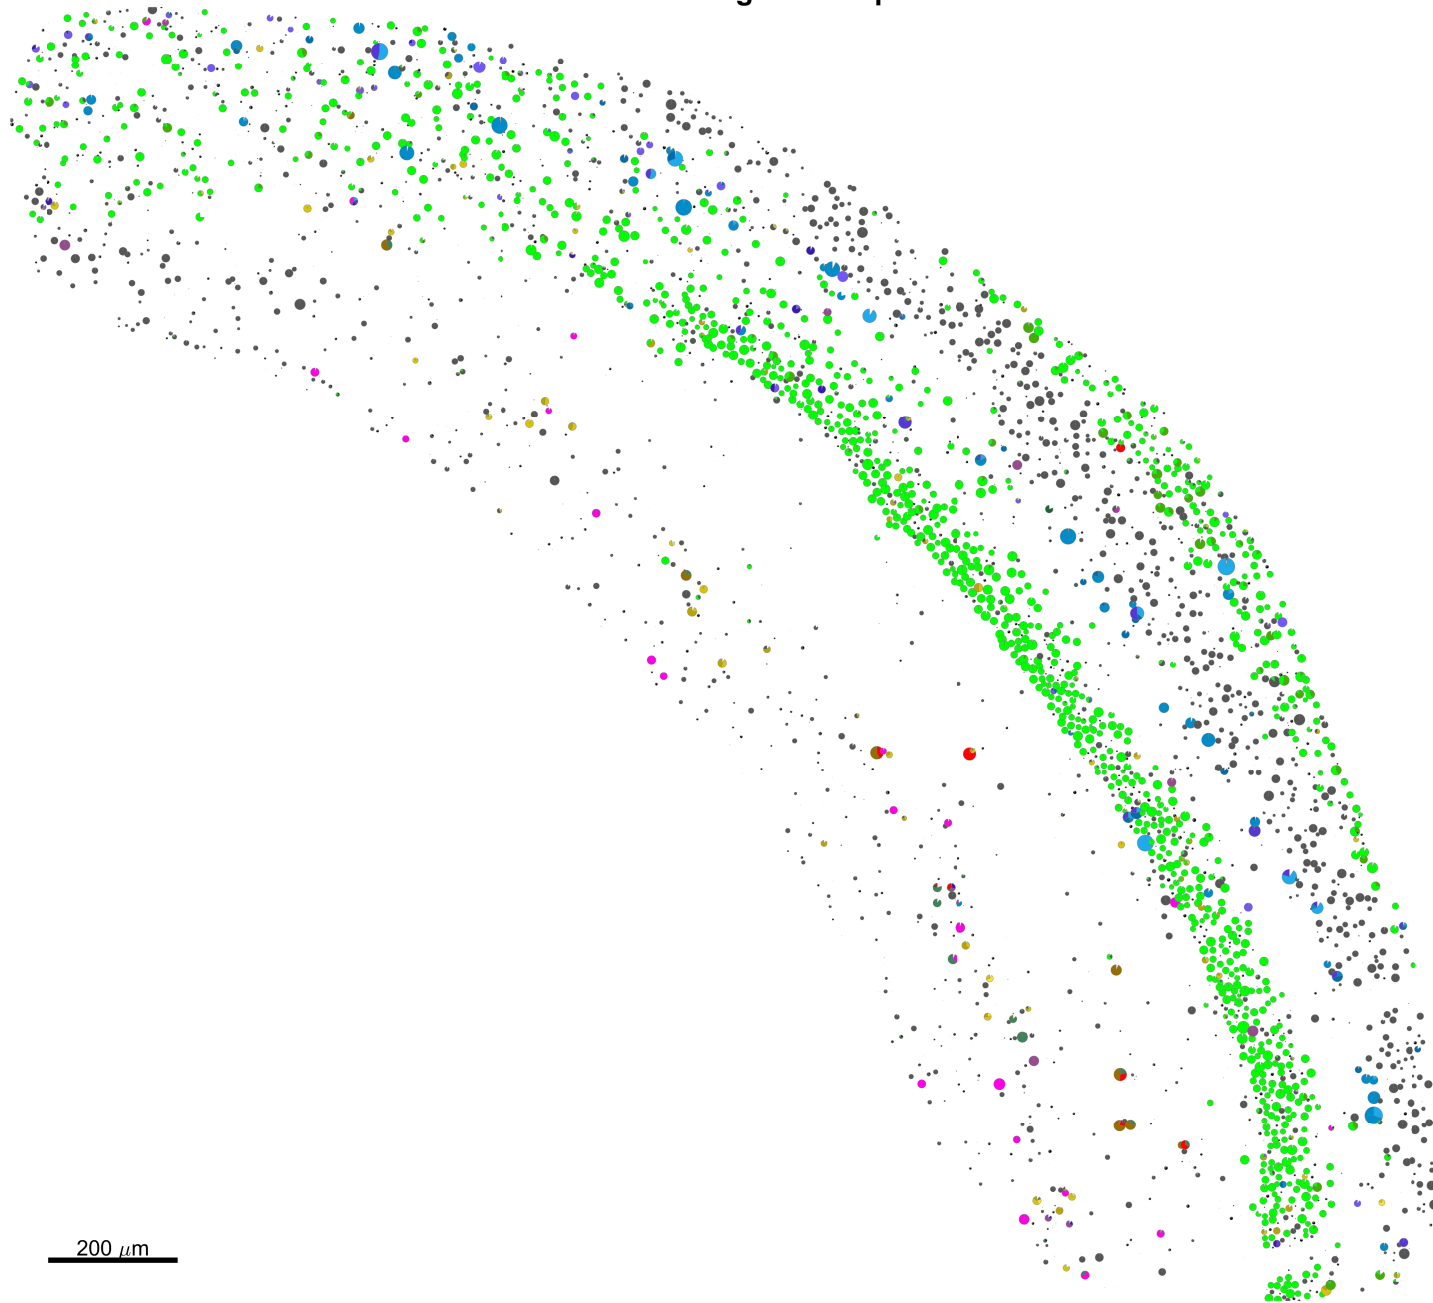

- O-Bi
- O/LM
- Hippocamposeptal
- Sst Nos1
- Axo-axonic
- Bistratified
- Basket
- MGE NGF/IVY
- CGE NGF
- Trilaminar
- Radiatum retrohip
- Cck Cxcl14+
- Cck Cxcl14-
- IS1
- IS3
- IS2
- PC CA1
- PC other
- Non neuron
- Uncalled

200  $\mu$ m

section 5-1 right hemisphere

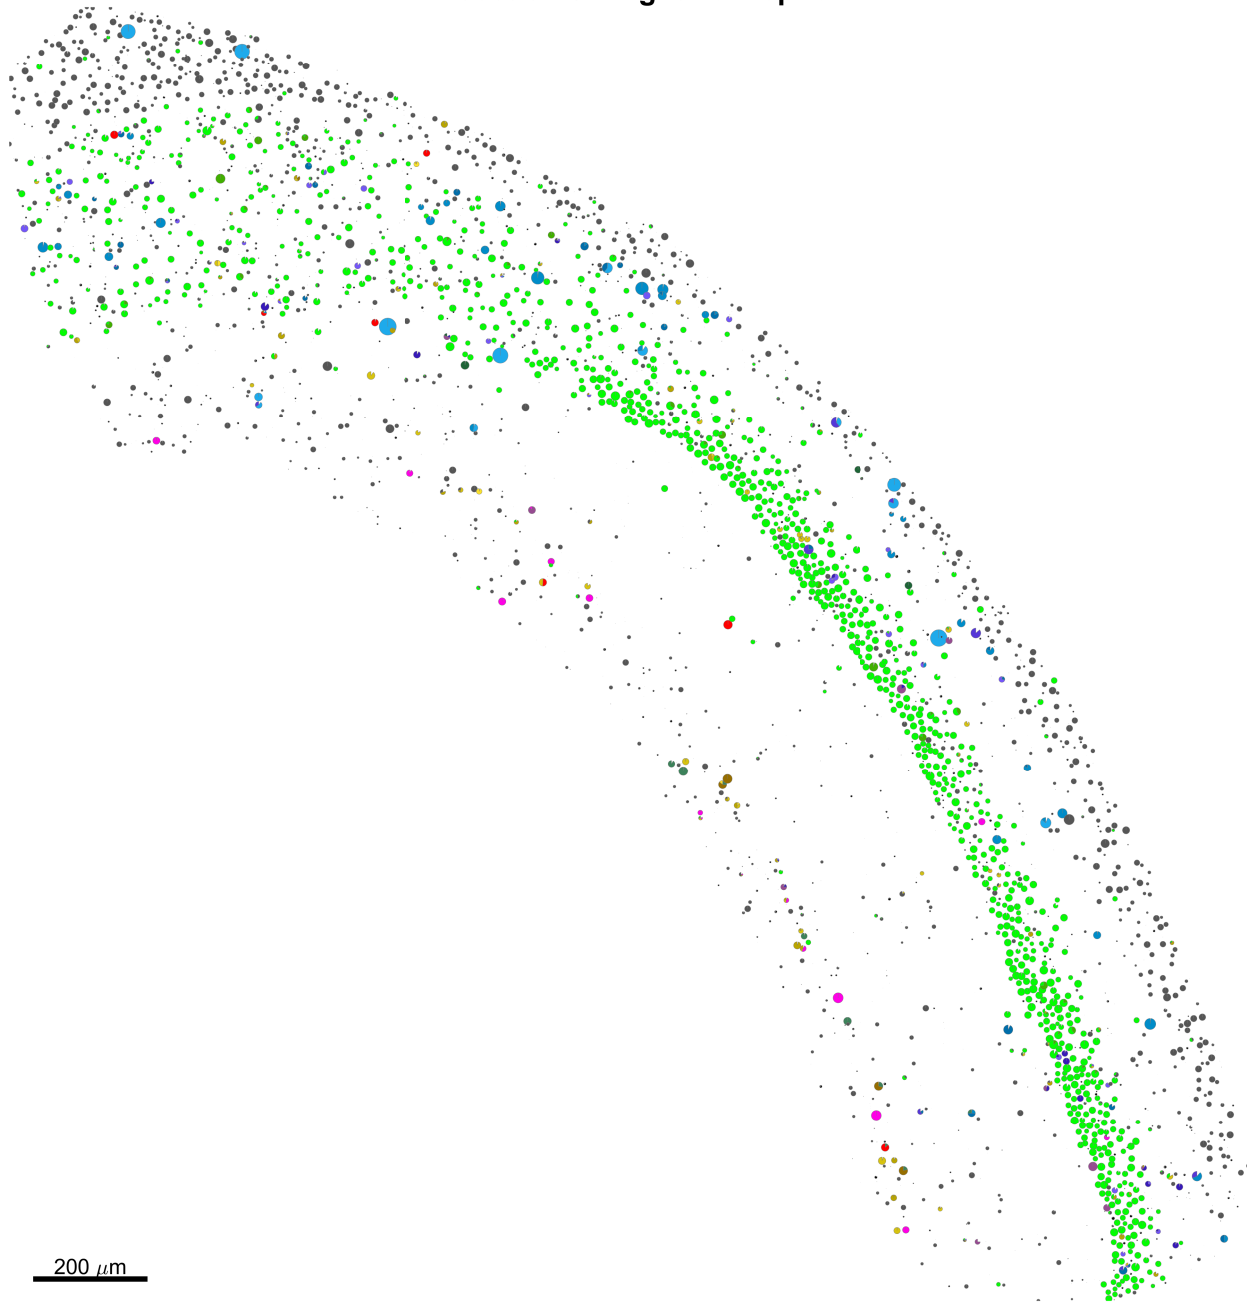

- O-Bi
- O/LM
- Hippocamptoseptal
- Sst Nos1
- Axo-axonic
- Bistratified
- Basket
- MGE NGF/IVY
- CGE NGF
- Trilaminar
- Radiatum retrohip
- Cck Cxcl14+
- Cck Cxcl14-
- IS1
- IS3
- IS2
- PC CA1
- PC other
- Non neuron
- Uncalled

200  $\mu$ m

section 4-1 right hemisphere

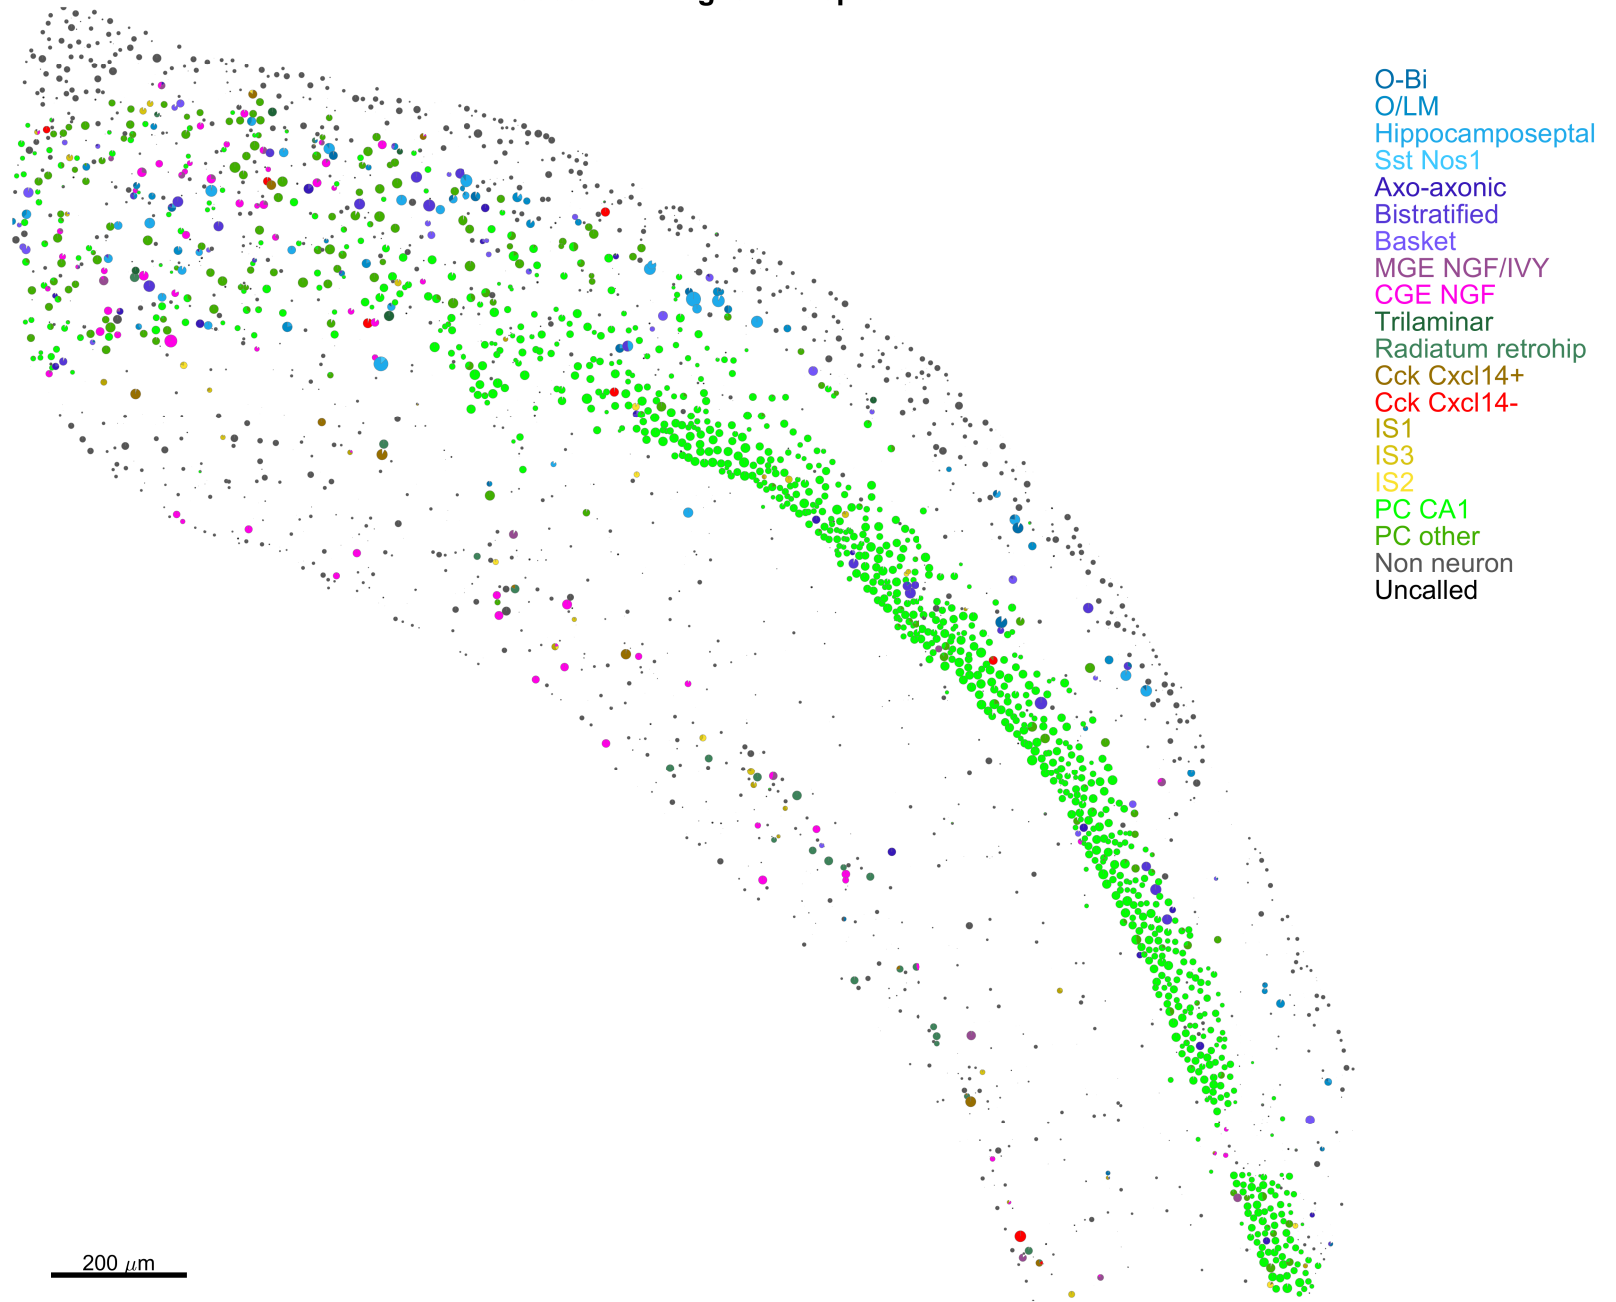

section 3-1 right hemisphere

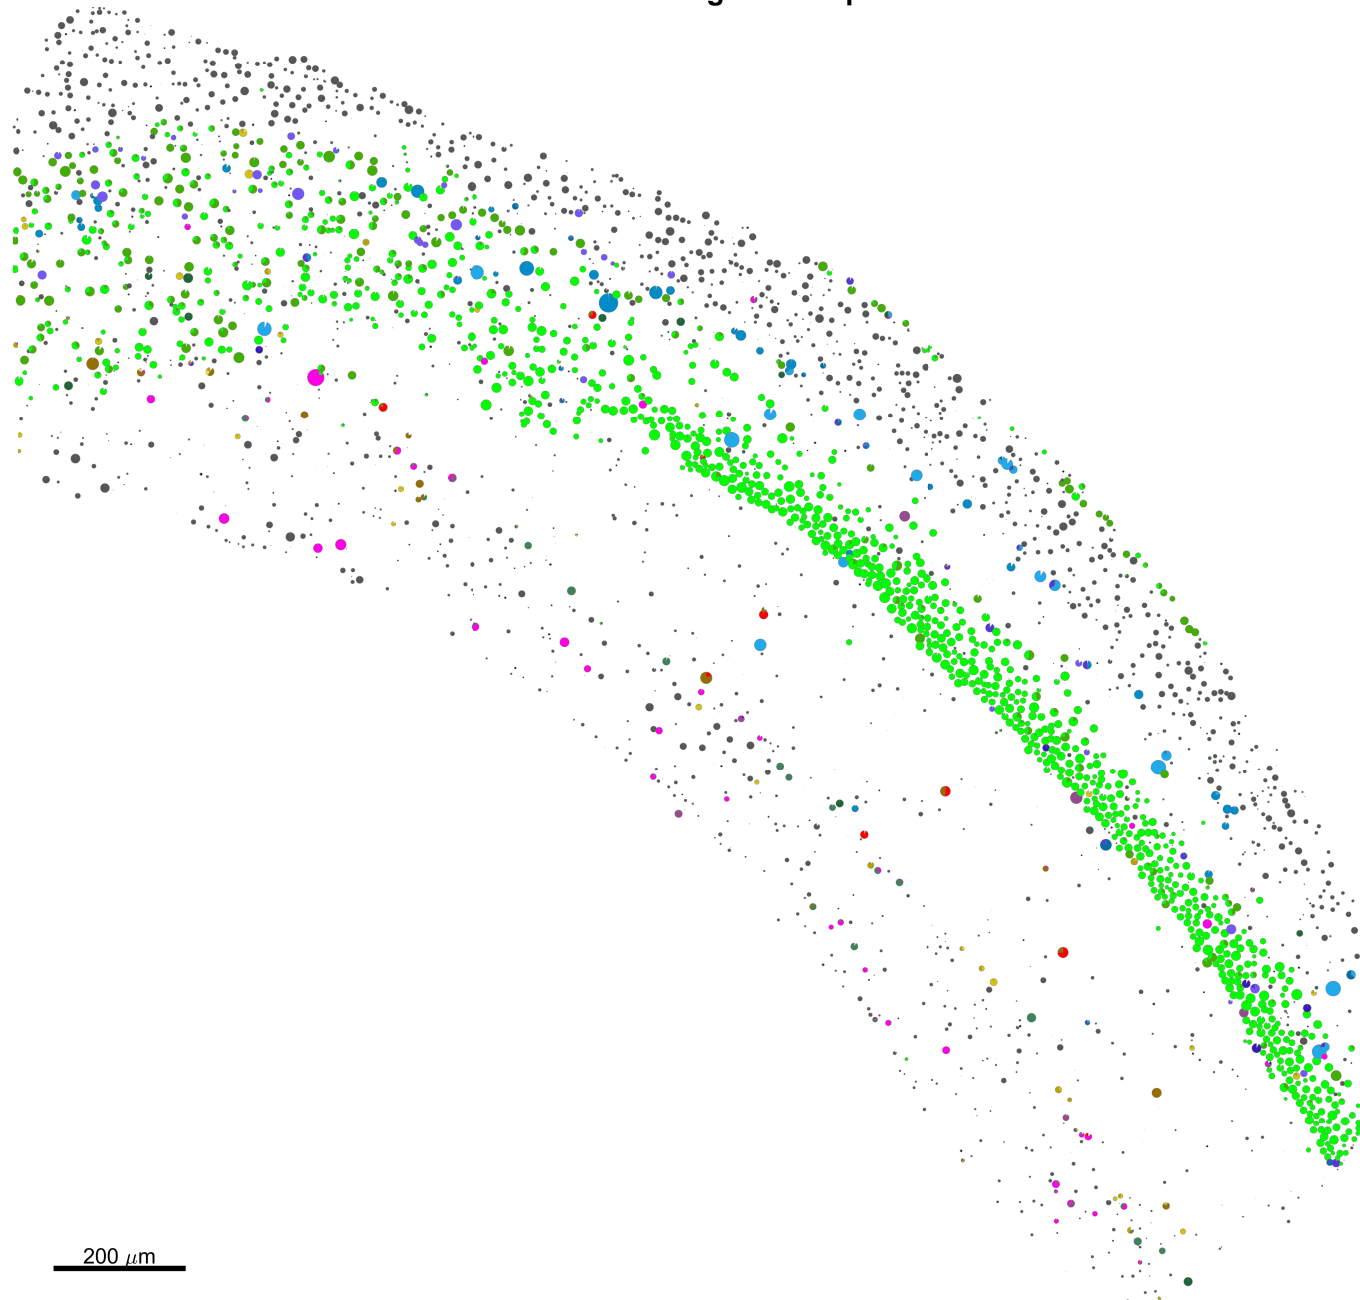

- O-Bi
- O/LM
- Hippocamposeptal
- Sst Nos1
- Axo-axonic
- Bistratified
- Basket
- MGE NGF/IVY
- CGE NGF
- Trilaminar
- Radiatum retrohip
- Cck Cxcl14+
- Cck Cxcl14-
- IS1
- IS3
- IS2
- PC CA1
- PC other
- Non neuron
- Uncalled

200  $\mu$ m
